# Supplementary material for: Assessment of the Effects of a Sage (Salvia officinalis) Extract on Cognitive Performance in Adolescents and Young Adults
Source: bioRxiv or medRxiv preprint supplement (doi:10.1101/2021.05.28.21257776), 2021-05-30
Supplement: Supplementary file [file media-3.pdf]

### 3 Supplementary Data File S3

#### Contents

|     |                                                     |    |
|-----|-----------------------------------------------------|----|
| 3   | Supplementary Data File S3.....                     | 1  |
| 3.1 | Baseline characteristics and control variables..... | 2  |
| 3.2 | Cognitive outcomes .....                            | 3  |
| 3.3 | Physiological outcomes.....                         | 22 |
| 3.4 | Exploratory cognitive outcomes.....                 | 27 |

### 3.1 Baseline characteristics and control variables

**Table 1: Inferential statistics for baseline characteristics and control variables**

| <b>F-tests for continuous control variables</b>              |                         |                           |                |                |
|--------------------------------------------------------------|-------------------------|---------------------------|----------------|----------------|
| <b>Control variable</b>                                      | <b>Numerator<br/>DF</b> | <b>Denominator<br/>DF</b> | <b>F-value</b> | <b>p-value</b> |
| PDS                                                          | 1                       | 35                        | 0.304          | 0.585          |
| SSKJ 3-8 R psychological stress symptoms                     | 1                       | 35                        | 0.058          | 0.811          |
| subscale anger                                               | 1                       | 35                        | 1.014          | 0.321          |
| subscale sadness                                             | 1                       | 35                        | 1.057          | 0.311          |
| subscale anxiety                                             | 1                       | 35                        | 0.560          | 0.459          |
| subscale wellbeing                                           | 1                       | 35                        | 1.146          | 0.292          |
| CAR increase                                                 | 1                       | 35                        | 3.111          | 0.087          |
| Sleep quality                                                | 1                       | 35                        | 0.390          | 0.536          |
| Sleep duration                                               | 1                       | 35                        | 0.300          | 0.587          |
| Fruit and vegetable intake                                   | 1                       | 35                        | 0.468          | 0.498          |
| Sweets intake                                                | 1                       | 35                        | 0.100          | 0.754          |
| Level of activity                                            | 1                       | 35                        | 0.020          | 0.890          |
| Weight                                                       | 1                       | 35                        | 2.328          | 0.136          |
| BMI                                                          | 1                       | 35                        | 1.720          | 0.198          |
| WHR                                                          | 1                       | 35                        | 0.191          | 0.664          |
| BFP                                                          | 1                       | 35                        | 0.421          | 0.521          |
| MP                                                           | 1                       | 35                        | 0.088          | 0.768          |
| <b>Fisher's exact test for categorical control variables</b> |                         |                           |                | <b>p-value</b> |
| Gender                                                       |                         |                           |                | 0.915          |

### 3.2 Cognitive outcomes

**Table 2: Inferential statistics for picture recognition accuracy in the ITT population, outcome was square transformed**

| <b>lme model summary</b>             |                     |                       |                |                |
|--------------------------------------|---------------------|-----------------------|----------------|----------------|
|                                      | <b>Estimate</b>     | <b>t-value</b>        | <b>DF</b>      | <b>p-value</b> |
| Intercept (placebo, baseline)        | 6022.543            | 8.09                  | 67             | <.001          |
| 1hr post dose                        | -1037.1             | -2.65                 | 67             | 0.010          |
| 2.5hr post dose                      | -735.713            | -1.88                 | 67             | 0.065          |
| 150 mg group                         | -782.388            | -1.57                 | 33             | 0.125          |
| Gender                               | 650.633             | 1.55                  | 33             | 0.131          |
| Sweets intake                        | 207.634             | 2.08                  | 33             | 0.046          |
| 1hr post dose:150 mg                 | 334.774             | 0.61                  | 67             | 0.543          |
| 2.5hr post dose:150 mg               | 310.582             | 0.57                  | 67             | 0.572          |
| <b>F-tests</b>                       |                     |                       |                |                |
|                                      | <b>Numerator DF</b> | <b>Denominator DF</b> | <b>F-value</b> | <b>p-value</b> |
| Intercept (placebo, baseline)        | 1                   | 67                    | 1252.24        | <.001          |
| Time                                 | 2                   | 67                    | 5.13           | 0.008          |
| Group                                | 1                   | 33                    | 2.99           | 0.093          |
| Gender                               | 1                   | 33                    | 3.18           | 0.084          |
| Sweets intake                        | 1                   | 33                    | 4.30           | 0.046          |
| Time:group                           | 2                   | 67                    | 0.232          | 0.794          |
| <b>Post-hoc Tukey tests for time</b> |                     |                       |                |                |
|                                      | <b>Estimate</b>     | <b>z-value</b>        | <b>p-value</b> |                |
| 1hr post dose - baseline             | -863.3              | -3.195                | 0.004          |                |
| 2.5hr post dose - baseline           | -574.0              | -2.125                | 0.085          |                |
| 2.5hr post dose - 1hr post dose      | 289.3               | 1.076                 | 0.529          |                |

**Table 3: Inferential statistics for picture recognition accuracy in the PP population, outcome was square transformed**

| <b>lme model summary</b>             |                     |                       |                |                |
|--------------------------------------|---------------------|-----------------------|----------------|----------------|
|                                      | <b>Estimate</b>     | <b>t-value</b>        | <b>DF</b>      | <b>p-value</b> |
| Intercept (placebo, baseline)        | 7066.03             | 8.08                  | 58             | <.001          |
| 1hr post dose                        | -884.583            | -2.01                 | 58             | 0.049          |
| 2.5hr post dose                      | -264.167            | -0.6                  | 58             | 0.550          |
| 150 mg group                         | -603.544            | -1.11                 | 27             | 0.275          |
| Gender                               | 867.752             | 1.93                  | 27             | 0.065          |
| SSKJ 3-8 R                           | -105.085            | -1.84                 | 27             | 0.076          |
| Palliative emotion regulation        |                     |                       |                |                |
| 1hr post dose:150 mg                 | 147.083             | 0.24                  | 58             | 0.811          |
| 2.5hr post dose:150 mg               | -150.286            | -0.25                 | 58             | 0.807          |
| <b>F-tests</b>                       |                     |                       |                |                |
|                                      | <b>Numerator DF</b> | <b>Denominator DF</b> | <b>F-value</b> | <b>p-value</b> |
| Intercept (placebo, baseline)        | 1                   | 58                    | 1015.80        | <.001          |
| Time                                 | 2                   | 58                    | 3.53           | 0.036          |
| Group                                | 1                   | 27                    | 3.47           | 0.074          |
| Gender                               | 1                   | 27                    | 3.49           | 0.073          |
| SSKJ 3-8 R                           | 1                   | 27                    | 3.39           | 0.076          |
| Palliative emotion regulation        |                     |                       |                |                |
| Time:group                           | 2                   | 58                    | 0.12           | 0.889          |
| <b>Post-hoc Tukey tests for time</b> |                     |                       |                |                |
|                                      | <b>Estimate</b>     | <b>z-value</b>        | <b>p-value</b> |                |
| 1hr post dose - baseline             | -808.7              | -2.685                | 0.020          |                |
| 2.5hr post dose - baseline           | -341.7              | -1.135                | 0.493          |                |
| 2.5hr post dose - 1hr post dose      | 466.9               | 1.550                 | 0.268          |                |

**Table 4: Inferential statistics for picture recognition reaction time in the ITT population, outcome was log transformed**

| <b>lme model summary</b>      |                     |                       |                |                |
|-------------------------------|---------------------|-----------------------|----------------|----------------|
|                               | <b>Estimate</b>     | <b>t-value</b>        | <b>DF</b>      | <b>p-value</b> |
| Intercept (placebo, baseline) | 7.042               | 173.45                | 67             | <.001          |
| 1hr post dose                 | -0.024              | -0.8                  | 67             | 0.425          |
| 2.5hr post dose               | -0.038              | -1.28                 | 67             | 0.206          |
| 150 mg group                  | 0.012               | 0.2                   | 35             | 0.840          |
| 1hr post dose:150 mg          | 0.055               | 1.33                  | 67             | 0.188          |
| 2.5hr post dose:150 mg        | 0.005               | 0.11                  | 67             | 0.914          |
| <b>F-tests</b>                |                     |                       |                |                |
|                               | <b>Numerator DF</b> | <b>Denominator DF</b> | <b>F-value</b> | <b>p-value</b> |
| Intercept (placebo, baseline) | 1                   | 67                    | 74404.60       | <.001          |
| Time                          | 2                   | 67                    | 2.08           | 0.133          |
| Group                         | 1                   | 35                    | 0.36           | 0.550          |
| Time:group                    | 2                   | 67                    | 1.08           | 0.345          |

**Table 5: Inferential statistics for word recognition accuracy in the ITT population**

| <b>lme model summary</b>      |                     |                       |                |                |
|-------------------------------|---------------------|-----------------------|----------------|----------------|
|                               | <b>Estimate</b>     | <b>t-value</b>        | <b>DF</b>      | <b>p-value</b> |
| Intercept (placebo, baseline) | 32.61               | 2.18                  | 67             | 0.033          |
| 1hr post dose                 | -0.555              | -0.25                 | 67             | 0.803          |
| 2.5hr post dose               | -3.147              | -1.42                 | 67             | 0.161          |
| 150 mg group                  | -1.743              | -0.51                 | 33             | 0.611          |
| PDS                           | 4.936               | 2.93                  | 33             | 0.006          |
| SSKJ 3-8 R                    |                     |                       |                |                |
| Psychological stress symptoms |                     |                       |                |                |
| wellbeing                     | 4.344               | 2.44                  | 33             | 0.02           |
| 1hr post dose:150 mg          | -1.604              | -0.51                 | 67             | 0.613          |
| 2.5hr post dose:150 mg        | -1.063              | -0.34                 | 67             | 0.735          |
| <b>F-tests</b>                |                     |                       |                |                |
|                               | <b>Numerator DF</b> | <b>Denominator DF</b> | <b>F-value</b> | <b>p-value</b> |
| Intercept (placebo, baseline) | 1                   | 67                    | 2976.85        | <.001          |
| Time                          | 2                   | 67                    | 2.85           | 0.065          |
| Group                         | 1                   | 33                    | 0.56           | 0.458          |
| PDS                           | 1                   | 33                    | 7.2            | 0.011          |
| SSKJ 3-8 R                    | 1                   | 33                    | 5.95           | 0.020          |
| Psychological stress symptoms |                     |                       |                |                |
| wellbeing                     |                     |                       |                |                |
| Time:group                    | 2                   | 67                    | 0.13           | 0.875          |

**Table 6: Inferential statistics for word recognition reaction time in the ITT population**

| <b>lme model summary</b>      |                     |                       |                |                |
|-------------------------------|---------------------|-----------------------|----------------|----------------|
|                               | <b>Estimate</b>     | <b>t-value</b>        | <b>DF</b>      | <b>p-value</b> |
| Intercept (placebo, baseline) | 828.229             | 9.01                  | 57             | <.001          |
| 1hr post dose                 | -38.359             | -1.71                 | 57             | 0.092          |
| 2.5hr post dose               | -49.461             | -2.26                 | 57             | 0.028          |
| 150 mg group                  | 4.966               | 0.14                  | 29             | 0.892          |
| <b>BFP</b>                    | -5.959              | -2.88                 | 29             | 0.007          |
| Fruit and vegetable intake    | -24.925             | -3                    | 29             | 0.006          |
| Sweets intake                 | 15.315              | 1.84                  | 29             | 0.075          |
| Sleep duration                | 25.538              | 3.28                  | 29             | 0.003          |
| 1hr post dose:150 mg          | 32.644              | 1.04                  | 57             | 0.304          |
| 2.5hr post dose:150 mg        | 75.777              | 2.44                  | 57             | 0.018          |
| <b>F-tests</b>                |                     |                       |                |                |
|                               | <b>Numerator DF</b> | <b>Denominator DF</b> | <b>F-value</b> | <b>p-value</b> |
| Intercept (placebo, baseline) | 1                   | 57                    | 3007.75        | <.001          |
| Time                          | 2                   | 57                    | 1.05           | 0.358          |
| Group                         | 1                   | 29                    | <.01           | 0.979          |
| <b>BFP</b>                    | 1                   | 29                    | 6.65           | 0.015          |
| Fruit and vegetable intake    | 1                   | 29                    | 7.14           | 0.012          |
| Sweets intake                 | 1                   | 29                    | 4.60           | 0.041          |
| Sleep duration                | 1                   | 29                    | 10.87          | 0.003          |
| Time:group                    | 2                   | 57                    | 2.98           | 0.059          |

**Table 7: Inferential statistics for immediate word recall accuracy in the ITT population**

| <b>lme model summary</b>      |                 |                |           |                |
|-------------------------------|-----------------|----------------|-----------|----------------|
|                               | <b>Estimate</b> | <b>t-value</b> | <b>DF</b> | <b>p-value</b> |
| Intercept (placebo, baseline) | 32.983          | 6.81           | 68        | <.001          |
| 1hr post dose                 | -4.074          | -1.29          | 68        | 0.202          |
| 2.5hr post dose               | -3.333          | -1.05          | 68        | 0.295          |
| 150 mg group                  | -1.536          | -0.41          | 34        | 0.685          |
| Gender                        | 7.762           | 2.57           | 34        | 0.015          |
| 1hr post dose:150 mg          | 3.347           | 0.75           | 68        | 0.455          |
| 2.5hr post dose:150 mg        | -1.836          | -0.41          | 68        | 0.681          |

  

| <b>F-tests</b>                |                     |                       |                |                |
|-------------------------------|---------------------|-----------------------|----------------|----------------|
|                               | <b>Numerator DF</b> | <b>Denominator DF</b> | <b>F-value</b> | <b>p-value</b> |
| Intercept (placebo, baseline) | 1                   | 68                    | 840.63         | <.001          |
| Time                          | 2                   | 68                    | 1.78           | 0.176          |
| Group                         | 1                   | 34                    | 0.31           | 0.583          |
| Gender                        | 1                   | 34                    | 6.60           | 0.015          |
| Time:group                    | 2                   | 68                    | 0.69           | 0.504          |



**Table 8: Inferential statistics for immediate word recall errors in the ITT population**

| <b>glm model summary</b>      |                 |                |                |
|-------------------------------|-----------------|----------------|----------------|
|                               | <b>Estimate</b> | <b>z-value</b> | <b>p-value</b> |
| Intercept (placebo, baseline) | -0.23033        | -0.274         | 0.784          |
| 1hr post dose                 | -0.77678        | -0.863         | 0.388          |
| 2.5hr post dose               | 0.00007         | 0.000          | 1.000          |
| 150 mg group                  | 0.48650         | 0.565          | 0.572          |
| CAR increase                  | -0.09924        | -1.505         | 0.132          |
| 1hr post dose:150 mg          | -0.75833        | -0.610         | 0.542          |
| 2.5hr post dose:150 mg        | -0.14956        | -0.134         | 0.893          |

  

| <b>LR-tests</b> |           |                           |                |
|-----------------|-----------|---------------------------|----------------|
|                 | <b>DF</b> | <b>LR Chisquare-value</b> | <b>p-value</b> |
| Time            | 2         | 3.8546                    | 0.146          |
| Group           | 1         | 0.1609                    | 0.688          |
| CAR increase    | 1         | 2.2655                    | 0.132          |
| Time:group      | 2         | 0.3945                    | 0.821          |

**Table 9: Inferential statistics for delayed word recall accuracy in the ITT population**

| <b>lme model summary</b>             |                     |                       |                |                |
|--------------------------------------|---------------------|-----------------------|----------------|----------------|
|                                      | <b>Estimate</b>     | <b>t-value</b>        | <b>DF</b>      | <b>p-value</b> |
| Intercept (placebo, baseline)        | 4.764               | 0.55                  | 68             | 0.585          |
| 1hr post dose                        | -8.89               | -2.81                 | 68             | 0.006          |
| 2.5hr post dose                      | -4.075              | -1.29                 | 68             | 0.202          |
| 150 mg group                         | 2.273               | 0.56                  | 33             | 0.577          |
| Sleep quality                        | 1.563               | 1.52                  | 33             | 0.139          |
| PDS                                  | 4.897               | 2.6                   | 33             | 0.014          |
| 1hr post dose:150 mg                 | -0.103              | -0.02                 | 68             | 0.982          |
| 2.5hr post dose:150 mg               | -6.029              | -1.35                 | 68             | 0.18           |
| <b>F-tests</b>                       |                     |                       |                |                |
|                                      | <b>Numerator DF</b> | <b>Denominator DF</b> | <b>F-value</b> | <b>p-value</b> |
| Intercept (placebo, baseline)        | 1                   | 68                    | 278.05         | <.001          |
| Time                                 | 2                   | 68                    | 9.05           | 0.003          |
| Group                                | 1                   | 33                    | 0.11           | 0.740          |
| Sleep quality                        | 1                   | 33                    | 4.87           | 0.034          |
| PDS                                  | 1                   | 33                    | 6.75           | 0.014          |
| Time:group                           | 2                   | 68                    | 1.19           | 0.309          |
| <b>Post-hoc Tukey tests for time</b> |                     |                       |                |                |
|                                      | <b>Estimate</b>     | <b>z-value</b>        | <b>p-value</b> |                |
| 1hr post dose - baseline             | -9.010              | -4.034                | < 0.001        |                |
| 2.5hr post dose - baseline           | -7.157              | -3.205                | 0.004          |                |
| 2.5hr post dose - 1hr post dose      | 1.852               | 0.826                 | 0.687          |                |

**Table 10: Inferential statistics for delayed word recall errors in the ITT population, outcome was log transformed after adding 1 to each value**

| <b>lme model summary</b>      |                     |                       |                |                |
|-------------------------------|---------------------|-----------------------|----------------|----------------|
|                               | <b>Estimate</b>     | <b>t-value</b>        | <b>DF</b>      | <b>p-value</b> |
| Intercept (placebo, baseline) | 0.642               | 4.71                  | 60             | <.001          |
| 1hr post dose                 | -0.093              | -0.84                 | 60             | 0.406          |
| 2.5hr post dose               | -0.231              | -2.00                 | 60             | 0.050          |
| 150 mg group                  | -0.176              | -1.22                 | 34             | 0.231          |
| CAR increase                  | -0.02               | -2.06                 | 34             | 0.047          |
| 1hr post dose:150 mg          | 0.378               | 2.34                  | 60             | 0.023          |
| 2.5hr post dose:150 mg        | 0.319               | 1.90                  | 60             | 0.062          |
| <b>F-tests</b>                |                     |                       |                |                |
|                               | <b>Numerator DF</b> | <b>Denominator DF</b> | <b>F-value</b> | <b>p-value</b> |
| Intercept (placebo, baseline) | 1                   | 60                    | 57.91          | <.001          |
| Time                          | 2                   | 60                    | 2.24           | 0.115          |
| Group                         | 1                   | 34                    | 1.25           | 0.271          |
| CAR increase                  | 1                   | 34                    | 4.59           | 0.040          |
| Time:group                    | 2                   | 60                    | 3.11           | 0.052          |

**Table 11: Inferential statistics for numeric working memory accuracy in the ITT population**

| <b>lme model summary</b>      |                     |                       |                |                |
|-------------------------------|---------------------|-----------------------|----------------|----------------|
|                               | <b>Estimate</b>     | <b>t-value</b>        | <b>DF</b>      | <b>p-value</b> |
| Intercept (placebo, baseline) | 87.811              | 34.64                 | 65             | <.001          |
| 1hr post dose                 | 4.277               | 2.49                  | 65             | 0.016          |
| 2.5hr post dose               | 2.93                | 1.73                  | 65             | 0.088          |
| 150 mg group                  | 4.117               | 2.43                  | 32             | 0.021          |
| <b>BFP</b>                    | -0.199              | -2.89                 | 32             | 0.007          |
| Fruit and vegetable intake    | 0.56                | 2.05                  | 32             | 0.048          |
| Sweets intake                 | 0.694               | 2.54                  | 32             | 0.016          |
| 1hr post dose:150 mg          | -3.463              | -1.45                 | 65             | 0.150          |
| 2.5hr post dose:150 mg        | -1.56               | -0.66                 | 65             | 0.511          |
| <b>F-tests</b>                |                     |                       |                |                |
|                               | <b>Numerator DF</b> | <b>Denominator DF</b> | <b>F-value</b> | <b>p-value</b> |
| Intercept (placebo, baseline) | 1                   | 65                    | 31889.29       | <.001          |
| Time                          | 2                   | 65                    | 2.49           | 0.091          |
| Group                         | 1                   | 32                    | 4.61           | 0.039          |
| <b>BFP</b>                    | 1                   | 32                    | 9.84           | 0.004          |
| Fruit and vegetable intake    | 1                   | 32                    | 3.44           | 0.073          |
| Sweets intake                 | 1                   | 32                    | 6.33           | 0.017          |
| Time:group                    | 2                   | 65                    | 1.06           | 0.353          |

**Table 12: Inferential statistics for numeric working memory reaction time in the ITT population**

| <b>lme model summary</b>      |                     |                       |                |                |
|-------------------------------|---------------------|-----------------------|----------------|----------------|
|                               | <b>Estimate</b>     | <b>t-value</b>        | <b>DF</b>      | <b>p-value</b> |
| Intercept (placebo, baseline) | 748.454             | 6.20                  | 68             | <.001          |
| 1hr post dose                 | -78.599             | -2.40                 | 68             | 0.019          |
| 2.5hr post dose               | -96.103             | -2.93                 | 68             | 0.005          |
| 150 mg group                  | -63.332             | -1.17                 | 32             | 0.251          |
| Fruit and vegetable intake    | -19.796             | -1.63                 | 32             | 0.113          |
| Sweets intake                 | 20.397              | 1.70                  | 32             | 0.099          |
| <b>SSKJ 3-8 R</b>             |                     |                       |                |                |
| Stress vulnerability          | 15.713              | 2.04                  | 32             | 0.050          |
| 1hr post dose:150 mg          | 89.498              | 1.94                  | 68             | 0.057          |
| 2.5hr post dose:150 mg        | 88.612              | 1.92                  | 68             | 0.059          |
| <b>F-tests</b>                |                     |                       |                |                |
|                               | <b>Numerator DF</b> | <b>Denominator DF</b> | <b>F-value</b> | <b>p-value</b> |
| Intercept (placebo, baseline) | 1                   | 68                    | 1326.58        | <.001          |
| Time                          | 2                   | 68                    | 2.58           | 0.083          |
| Group                         | 1                   | 32                    | 0.87           | 0.357          |
| Fruit and vegetable intake    | 1                   | 32                    | 3.66           | 0.065          |
| Sweets intake                 | 1                   | 32                    | 3.61           | 0.067          |
| <b>SSKJ 3-8 R</b>             | 1                   | 32                    | 4.11           | 0.051          |
| Stress vulnerability          |                     |                       |                |                |
| Time:group                    | 2                   | 68                    | 2.48           | 0.091          |

**Table 13: Inferential statistics for spatial working memory accuracy in the ITT population**

| <b>lme model summary</b>      |                     |                       |                |                |
|-------------------------------|---------------------|-----------------------|----------------|----------------|
|                               | <b>Estimate</b>     | <b>t-value</b>        | <b>DF</b>      | <b>p-value</b> |
| Intercept (placebo, baseline) | 107.517             | 12.32                 | 64             | 0              |
| 1hr post dose                 | 1.36                | 1.21                  | 64             | 0.231          |
| 2.5hr post dose               | 1.006               | 0.88                  | 64             | 0.383          |
| 150 mg group                  | 2.531               | 1.86                  | 31             | 0.072          |
| WHR                           | -21.517             | -2.04                 | 31             | 0.05           |
| CAR increase                  | 0.187               | 2.07                  | 31             | 0.047          |
| SSKJ 3-8 R                    |                     |                       |                |                |
| stress coping strategies:     |                     |                       |                |                |
| seeking social support        | 0.211               | 1.64                  | 31             | 0.111          |
| 1hr post dose:150 mg          | -2.386              | -1.53                 | 64             | 0.132          |
| 2.5hr post dose:150 mg        | -1.961              | -1.23                 | 64             | 0.222          |
| <b>F-tests</b>                |                     |                       |                |                |
|                               | <b>Numerator DF</b> | <b>Denominator DF</b> | <b>F-value</b> | <b>p-value</b> |
| Intercept (placebo, baseline) | 1                   | 64                    | 37846.11       | <.0001         |
| Time                          | 2                   | 64                    | 0.02           | 0.9763         |
| Group                         | 1                   | 31                    | 0.44           | 0.5112         |
| WHR                           | 1                   | 31                    | 3.73           | 0.0625         |
| CAR increase                  | 1                   | 31                    | 5.62           | 0.0241         |
| SSKJ 3-8 R                    | 1                   | 31                    | 2.63           | 0.1148         |
| stress coping strategies:     |                     |                       |                |                |
| seeking social support        |                     |                       |                |                |
| Time:group                    | 2                   | 64                    | 1.32           | 0.2736         |

**Table 14: Inferential statistics for spatial working memory reaction time in the ITT population, outcome was log transformed**

| <b>lme model summary</b>                                         |                     |                       |                |                |
|------------------------------------------------------------------|---------------------|-----------------------|----------------|----------------|
|                                                                  | <b>Estimate</b>     | <b>t-value</b>        | <b>DF</b>      | <b>p-value</b> |
| Intercept (placebo, baseline)                                    | 6.622               | 68.02                 | 63             | 0              |
| 1hr post dose                                                    | -0.006              | -0.17                 | 63             | 0.868          |
| 2.5hr post dose                                                  | -0.019              | -0.51                 | 63             | 0.609          |
| 150 mg group                                                     | 0.021               | 0.41                  | 31             | 0.683          |
| Fruit and vegetable intake                                       | -0.017              | -1.48                 | 31             | 0.148          |
| Sweets intake                                                    | 0.027               | 2.41                  | 31             | 0.022          |
| SSKJ 3-8 R                                                       | 0.009               | 1.56                  | 31             | 0.128          |
| stress coping strategies:<br>anger related emotion<br>regulation |                     |                       |                |                |
| SSKJ 3-8 R                                                       | -0.012              | -2.12                 | 31             | 0.042          |
| stress coping strategies:<br>seeking social support              |                     |                       |                |                |
| 1hr post dose:150 mg                                             | -0.042              | -0.8                  | 63             | 0.428          |
| 2.5hr post dose:150 mg                                           | -0.037              | -0.71                 | 63             | 0.479          |
| <b>F-tests</b>                                                   |                     |                       |                |                |
|                                                                  | <b>Numerator DF</b> | <b>Denominator DF</b> | <b>F-value</b> | <b>p-value</b> |
| Intercept (placebo, baseline)                                    | 1                   | 63                    | 98651.49       | <.001          |
| Time                                                             | 2                   | 63                    | 1.41           | 0.252          |
| Group                                                            | 1                   | 31                    | 0.17           | 0.686          |
| Fruit and vegetable intake                                       | 1                   | 31                    | 6.84           | 0.014          |
| Sweets intake                                                    |                     | 31                    | 5.82           | 0.022          |
| SSKJ 3-8 R                                                       |                     | 31                    | 2.36           | 0.135          |
| stress coping strategies:<br>anger related emotion<br>regulation |                     |                       |                |                |
| SSKJ 3-8 R                                                       |                     | 31                    | 4.56           | 0.041          |
| stress coping strategies:<br>seeking social support              |                     |                       |                |                |
| Time:group                                                       | 2                   | 63                    | 0.38           | 0.683          |

**Table 15: Inferential statistics for simple reaction time in the ITT population**

| <b>lme model summary</b>      |                     |                       |                |                |
|-------------------------------|---------------------|-----------------------|----------------|----------------|
|                               | <b>Estimate</b>     | <b>t-value</b>        | <b>DF</b>      | <b>p-value</b> |
| Intercept (placebo, baseline) | 327.91              | 26.19                 | 66             | 0              |
| 1hr post dose                 | 0.623               | 0.09                  | 66             | 0.927          |
| 2.5hr post dose               | 8.882               | 1.32                  | 66             | 0.192          |
| 150 mg group                  | -4.106              | -0.38                 | 32             | 0.704          |
| Sweets intake                 | 4.224               | 1.66                  | 32             | 0.106          |
| <b>SSKJ 3-8 R</b>             |                     |                       |                |                |
| Psychological stress symptoms |                     |                       |                |                |
| sadness                       | 6.113               | 2.2                   | 32             | 0.035          |
| <b>SSKJ 3-8 R</b>             |                     |                       |                |                |
| Psychological stress symptoms |                     |                       |                |                |
| anxiety                       | 0.439               | 0.2                   | 32             | 0.843          |
| 1hr post dose:150 mg          | 8.605               | 0.91                  | 66             | 0.369          |
| 2.5hr post dose:150 mg        | 0.17                | 0.02                  | 66             | 0.986          |
| <b>F-tests</b>                |                     |                       |                |                |
|                               | <b>Numerator DF</b> | <b>Denominator DF</b> | <b>F-value</b> | <b>p-value</b> |
| Intercept (placebo, baseline) | 1                   | 66                    | 6237.228       | <.001          |
| Time                          | 2                   | 66                    | 1.966          | 0.148          |
| Group                         | 1                   | 32                    | 0.443          | 0.511          |
| Sweets intake                 | 1                   | 32                    | 5.855          | 0.021          |
| <b>SSKJ 3-8 R</b>             | 1                   | 32                    | 5.826          | 0.022          |
| Psychological stress symptoms |                     |                       |                |                |
| sadness                       |                     |                       |                |                |
| <b>SSKJ 3-8 R</b>             | 1                   | 32                    | 0.041          | 0.841          |
| Psychological stress symptoms |                     |                       |                |                |
| anxiety                       |                     |                       |                |                |
| Time:group                    | 2                   | 66                    | 0.548          | 0.581          |



**Table 16: Inferential statistics for digit vigilance accuracy in the ITT population**

| <b>lme model summary</b>      |                 |                |           |                |
|-------------------------------|-----------------|----------------|-----------|----------------|
|                               | <b>Estimate</b> | <b>t-value</b> | <b>DF</b> | <b>p-value</b> |
| Intercept (placebo, baseline) | 94.321          | 92.72          | 63        | <.001          |
| 1hr post dose                 | -0.092          | -0.08          | 63        | 0.936          |
| 2.5hr post dose               | 0.778           | 0.66           | 63        | 0.511          |
| 150 mg group                  | 1.657           | 1.16           | 35        | 0.256          |
| 1hr post dose:150 mg          | -1.496          | -0.92          | 63        | 0.361          |
| 2.5hr post dose:150 mg        | -2.793          | -1.69          | 63        | 0.097          |

  

| <b>F-tests</b>                |                     |                       |                |                |
|-------------------------------|---------------------|-----------------------|----------------|----------------|
|                               | <b>Numerator DF</b> | <b>Denominator DF</b> | <b>F-value</b> | <b>p-value</b> |
| Intercept (placebo, baseline) | 1                   | 63                    | 29405.99       | <.001          |
| Time                          | 2                   | 63                    | 0.57           | 0.571          |
| Group                         | 1                   | 35                    | 0.07           | 0.799          |
| Time:group                    | 2                   | 63                    | 1.43           | 0.247          |

**Table 17: Inferential statistics for digit vigilance reaction time in the ITT population**

| <b>lme model summary</b>      |                     |                       |                |                |
|-------------------------------|---------------------|-----------------------|----------------|----------------|
|                               | <b>Estimate</b>     | <b>t-value</b>        | <b>DF</b>      | <b>p-value</b> |
| Intercept (placebo, baseline) | 582.543             | 23.15                 | 68             | 0              |
| 1hr post dose                 | -2.954              | -0.34                 | 68             | 0.733          |
| 2.5hr post dose               | 7.602               | 0.88                  | 68             | 0.381          |
| 150 mg group                  | -11.047             | -0.94                 | 33             | 0.352          |
| Sleep quality                 | -7.305              | -2.38                 | 33             | 0.023          |
| Gender                        | -15.885             | -1.52                 | 33             | 0.139          |
| 1hr post dose:150 mg          | 6.58                | 0.54                  | 68             | 0.59           |
| 2.5hr post dose:150 mg        | -11.348             | -0.93                 | 68             | 0.353          |
| <b>F-tests</b>                |                     |                       |                |                |
|                               | <b>Numerator DF</b> | <b>Denominator DF</b> | <b>F-value</b> | <b>p-value</b> |
| Intercept (placebo, baseline) | 1                   | 68                    | 11614.02       | <.001          |
| Time                          | 2                   | 68                    | 0.06           | 0.944          |
| Group                         | 1                   | 33                    | 0.96           | 0.336          |
| Sleep quality                 | 1                   | 33                    | 7.48           | 0.010          |
| Gender                        | 1                   | 33                    | 2.31           | 0.138          |
| Time:group                    | 2                   | 68                    | 1.11           | 0.336          |

**Table 18: Inferential statistics for digit vigilance false alarms in the ITT population, outcome was log transformed after adding 1 to each value**

| <b>lme model summary</b>      |                     |                       |                |                |
|-------------------------------|---------------------|-----------------------|----------------|----------------|
|                               | <b>Estimate</b>     | <b>t-value</b>        | <b>DF</b>      | <b>p-value</b> |
| Intercept (placebo, baseline) | 0.676               | 4.62                  | 64             | <.001          |
| 1hr post dose                 | 0.128               | 0.79                  | 64             | 0.434          |
| 2.5hr post dose               | 0.0003              | 0.001                 | 64             | 0.999          |
| 150 mg group                  | 0.069               | 0.34                  | 35             | 0.736          |
| 1hr post dose:150 mg          | 0.064               | 0.28                  | 64             | 0.777          |
| 2.5hr post dose:150 mg        | 0.053               | 0.23                  | 64             | 0.818          |
| <b>F-tests</b>                |                     |                       |                |                |
|                               | <b>Numerator DF</b> | <b>Denominator DF</b> | <b>F-value</b> | <b>p-value</b> |
| Intercept (placebo, baseline) | 1                   | 64                    | 98.33          | <.001          |
| Time                          | 2                   | 64                    | 1.17           | 0.318          |
| Group                         | 1                   | 35                    | 0.47           | 0.497          |
| Time:group                    | 2                   | 64                    | 0.05           | 0.955          |

**Table 19: Inferential statistics for choice reaction time accuracy in the ITT population**

| <b>lme model summary</b>             |                     |                       |                |                |
|--------------------------------------|---------------------|-----------------------|----------------|----------------|
|                                      | <b>Estimate</b>     | <b>t-value</b>        | <b>DF</b>      | <b>p-value</b> |
| Intercept (placebo, baseline)        | 102.976             | 13.65                 | 62             | <.001          |
| 1hr post dose                        | 1.667               | 2.22                  | 62             | 0.03           |
| 2.5hr post dose                      | 1.889               | 2.51                  | 62             | 0.015          |
| 150 mg group                         | -0.168              | -0.16                 | 33             | 0.87           |
| WHR                                  | -14.59              | -1.64                 | 33             | 0.111          |
| PDS                                  | 0.735               | 1.49                  | 33             | 0.147          |
| 1hr post dose:150 mg                 | 0.408               | 0.37                  | 62             | 0.711          |
| 2.5hr post dose:150 mg               | -0.695              | -0.63                 | 62             | 0.529          |
| <b>F-tests</b>                       |                     |                       |                |                |
|                                      | <b>Numerator DF</b> | <b>Denominator DF</b> | <b>F-value</b> | <b>p-value</b> |
| Intercept (placebo, baseline)        | 1                   | 62                    | 51623.73       | <.001          |
| Time                                 | 2                   | 62                    | 6.85           | 0.002          |
| Group                                | 1                   | 33                    | 0.10           | 0.755          |
| WHR                                  | 1                   | 33                    | 3.38           | 0.075          |
| PDS                                  | 1                   | 33                    | 2.25           | 0.143          |
| Time:group                           | 2                   | 62                    | 0.50           | 0.612          |
| <b>Post-hoc Tukey tests for time</b> |                     |                       |                |                |
|                                      | <b>Estimate</b>     | <b>z-value</b>        | <b>p-value</b> |                |
| 1hr post dose - baseline             | 1.8098              | 3.333                 | 0.003          |                |
| 2.5hr post dose - baseline           | 1.5441              | 2.845                 | 0.012          |                |
| 2.5hr post dose - 1hr post dose      | -0.2658             | -0.480                | 0.881          |                |

**Table 20: Inferential statistics for choice reaction time in the ITT population, outcome was log transformed**

| <b>lme model summary</b>      |                     |                       |                |                |
|-------------------------------|---------------------|-----------------------|----------------|----------------|
|                               | <b>Estimate</b>     | <b>t-value</b>        | <b>DF</b>      | <b>p-value</b> |
| Intercept (placebo, baseline) | 6.233               | 91.25                 | 66             | 0              |
| 1hr post dose                 | 0.025               | 1.47                  | 66             | 0.145          |
| 2.5hr post dose               | 0.039               | 2.27                  | 66             | 0.026          |
| 150 mg group                  | 0.037               | 1.13                  | 32             | 0.268          |
| Fruit and vegetable intake    | -0.016              | -1.93                 | 32             | 0.062          |
| Sweets intake                 | 0.02                | 2.6                   | 32             | 0.014          |
| PDS                           | -0.033              | -1.82                 | 32             | 0.078          |
| 1hr post dose:150 mg          | -0.028              | -1.15                 | 66             | 0.253          |
| 2.5hr post dose:150 mg        | -0.04               | -1.65                 | 66             | 0.105          |
| <b>F-tests</b>                |                     |                       |                |                |
|                               | <b>Numerator DF</b> | <b>Denominator DF</b> | <b>F-value</b> | <b>p-value</b> |
| Intercept (placebo, baseline) | 1                   | 66                    | 175419.5       | <.001          |
| Time                          | 2                   | 66                    | 1.37           | 0.261          |
| Group                         | 1                   | 32                    | 0.07           | 0.790          |
| Fruit and vegetable intake    | 1                   | 32                    | 6.77           | 0.014          |
| Sweets intake                 | 1                   | 32                    | 5.48           | 0.026          |
| PDS                           | 1                   | 32                    | 3.21           | 0.083          |
| Time:group                    | 2                   | 66                    | 1.41           | 0.250          |

### 3.3 Physiological outcomes

**Table 21: Inferential statistics for HR in the ITT population, outcome was log transformed**

| <b>lme model summary</b>      |                     |                       |                |                |
|-------------------------------|---------------------|-----------------------|----------------|----------------|
|                               | <b>Estimate</b>     | <b>t-value</b>        | <b>DF</b>      | <b>p-value</b> |
| Intercept (placebo, baseline) | 4.323               | 29.31                 | 177            | <.001          |
| time                          | 0.0001              | 1.45                  | 177            | 0.150          |
| 150 mg group                  | 0.036               | 0.77                  | 33             | 0.446          |
| Level of activity             | -0.041              | -2.87                 | 33             | 0.007          |
| <b>SSKJ 3-8 R</b>             |                     |                       |                |                |
| stress vulnerability          | 0.01                | 1.25                  | 33             | 0.221          |
| time:150 mg                   | -0.0002             | -1.69                 | 177            | 0.092          |
| <b>F-tests</b>                |                     |                       |                |                |
|                               | <b>Numerator DF</b> | <b>Denominator DF</b> | <b>F-value</b> | <b>p-value</b> |
| Intercept (placebo, baseline) | 1                   | 177                   | 37387.98       | <.001          |
| Time                          | 1                   | 177                   | 0.16           | 0.694          |
| Group                         | 1                   | 33                    | 0.00           | 0.974          |
| Level of activity             | 1                   | 33                    | 14.32          | <.001          |
| <b>SSKJ 3-8 R</b>             | 1                   | 33                    | 1.61           | 0.213          |
| stress vulnerability          |                     |                       |                |                |
| Time:group                    | 1                   | 177                   | 2.87           | 0.092          |

**Table 22: Inferential statistics for diastolic BP in the ITT population, outcome was log transformed**

| <b>lme model summary</b>      |                     |                       |                |                |
|-------------------------------|---------------------|-----------------------|----------------|----------------|
|                               | <b>Estimate</b>     | <b>t-value</b>        | <b>DF</b>      | <b>p-value</b> |
| Intercept (placebo, baseline) | 4.02                | 28.25                 | 177            | <.001          |
| time                          | <.001               | 0.46                  | 177            | 0.645          |
| 150 mg group                  | -0.017              | -0.51                 | 29             | 0.617          |
| Sleep disruption              | 0.1                 | 2.88                  | 29             | 0.007          |
| PDS                           | 0.015               | 0.7                   | 29             | 0.489          |
| Weight                        | 0.004               | 2.48                  | 29             | 0.019          |
| Level of activity             | -0.021              | -1.94                 | 29             | 0.062          |
| SSKJ 3-8 R                    | <.001               | 0.01                  | 29             | 0.995          |
| stress vulnerability          |                     |                       |                |                |
| SSKJ 3-8 R                    | -0.006              | -1.54                 | 29             | 0.135          |
| stress coping strategy:       |                     |                       |                |                |
| avoidant coping               |                     |                       |                |                |
| time:150 mg                   | <.001               | 0.23                  | 177            | 0.821          |
| <b>F-tests</b>                |                     |                       |                |                |
|                               | <b>Numerator DF</b> | <b>Denominator DF</b> | <b>F-value</b> | <b>p-value</b> |
| Intercept (placebo, baseline) | 1                   | 177                   | 81518.24       | <.001          |
| Time                          | 1                   | 177                   | 0.95           | 0.331          |
| Group                         | 1                   | 29                    | 0.00           | 0.971          |
| Sleep disruption              | 1                   | 29                    | 10.27          | 0.003          |
| PDS                           | 1                   | 29                    | 9.73           | 0.004          |
| Weight                        | 1                   | 29                    | 4.66           | 0.039          |
| Level of activity             | 1                   | 29                    | 4.28           | 0.048          |
| SSKJ 3-8 R                    | 1                   | 29                    | 0.01           | 0.938          |
| stress vulnerability          |                     |                       |                |                |
| SSKJ 3-8 R                    | 1                   | 29                    | 2.39           | 0.133          |
| stress coping strategy:       |                     |                       |                |                |
| avoidant coping               |                     |                       |                |                |
| Time:Group                    | 1                   | 177                   | 0.05           | 0.821          |

**Table 23: Inferential statistics for systolic BP in the ITT population, outcome was log transformed**

| <b>lme model summary</b>                     |                     |                       |                |                |
|----------------------------------------------|---------------------|-----------------------|----------------|----------------|
|                                              | <b>Estimate</b>     | <b>t-value</b>        | <b>DF</b>      | <b>p-value</b> |
| Intercept (placebo, baseline)                | 4.661               | 33.67                 | 178            | <.001          |
| Time                                         | <.001               | 2.8                   | 178            | 0.006          |
| 150 mg group                                 | -0.016              | -0.71                 | 30             | 0.481          |
| Sleep disruption                             | 0.06                | 2.48                  | 30             | 0.019          |
| PDS                                          | 0.02                | 1.49                  | 30             | 0.147          |
| Weight                                       | 0.003               | 2.34                  | 30             | 0.026          |
| Sweets intake                                | -0.011              | -2.01                 | 30             | 0.054          |
| SSKJ 3-8 R                                   |                     |                       |                |                |
| Psychological stress symptoms                |                     |                       |                |                |
| wellbeing                                    | -0.023              | -1.7                  | 30             | 0.1            |
| time:150 mg                                  | <.001               | -1.05                 | 178            | 0.296          |
| <b>lme model summary without interaction</b> |                     |                       |                |                |
|                                              | <b>Estimate</b>     | <b>t-value</b>        | <b>DF</b>      | <b>p-value</b> |
| Intercept (placebo, baseline)                | 4.664               | 33.64                 | 179            | <.001          |
| Time                                         | <.001               | 2.92                  | 179            | 0.004          |
| 150 mg group                                 | -0.023              | -1.06                 | 30             | 0.299          |
| Sleep disruption                             | 0.06                | 2.47                  | 30             | 0.019          |
| PDS                                          | 0.02                | 1.49                  | 30             | 0.148          |
| Weight                                       | 0.003               | 2.34                  | 30             | 0.026          |
| Sweets intake                                | -0.011              | -2                    | 30             | 0.055          |
| SSKJ 3-8 R                                   | -0.023              | -1.69                 | 30             | 0.101          |
| Psychological stress symptoms                |                     |                       |                |                |
| wellbeing                                    |                     |                       |                |                |
| <b>F-tests</b>                               |                     |                       |                |                |
|                                              | <b>Numerator DF</b> | <b>Denominator DF</b> | <b>F-value</b> | <b>p-value</b> |
| Intercept (placebo, baseline)                | 1                   | 178                   | 209345.19      | <.001          |
| Time                                         | 1                   | 178                   | 8.67           | 0.004          |
| Group                                        | 1                   | 30                    | 0.98           | 0.331          |
| Sleep disruption                             | 1                   | 30                    | 8.04           | 0.008          |
| PDS                                          | 1                   | 30                    | 6.01           | 0.020          |
| Weight                                       | 1                   | 30                    | 11.13          | 0.002          |
| Sweets intake                                | 1                   | 30                    | 3.16           | 0.086          |
| SSKJ 3-8 R                                   | 1                   | 30                    | 2.87           | 0.100          |
| Psychological stress symptoms                |                     |                       |                |                |
| wellbeing                                    |                     |                       |                |                |
| Time:Group                                   | 1                   | 178                   | 1.10           | 0.296          |



**Table 24: Inferential statistics for salivary cortisol in the ITT population, outcome was square root transformed**

| <b>lme model summary</b>      |                     |                       |                |                |
|-------------------------------|---------------------|-----------------------|----------------|----------------|
|                               | <b>Estimate</b>     | <b>t-value</b>        | <b>DF</b>      | <b>p-value</b> |
| Intercept (placebo, baseline) | 1.819               | 4.38                  | 173            | <.001          |
| Time                          | 0.001               | 2.09                  | 173            | 0.038          |
| 150 mg group                  | 0.039               | 0.49                  | 28             | 0.631          |
| Gender                        | 0.157               | 2.02                  | 28             | 0.053          |
| Sleep duration                | -0.045              | -2.72                 | 28             | 0.011          |
| Sweets intake                 | 0.019               | 1.06                  | 28             | 0.300          |
| Level of activity             | -0.06               | -2.08                 | 28             | 0.047          |
| SSKJ 3-8 R                    | 0.024               | 0.97                  | 28             | 0.338          |
| Physical stress symptoms      |                     |                       |                |                |
| SSKJ 3-8 R                    | 0.013               | 0.93                  | 28             | 0.361          |
| stress vulnerability          |                     |                       |                |                |
| Time:150 mg                   | -0.001              | -1.51                 | 173            | 0.133          |
| <b>F-tests</b>                |                     |                       |                |                |
|                               | <b>Numerator DF</b> | <b>Denominator DF</b> | <b>F-value</b> | <b>p-value</b> |
| Intercept (placebo, baseline) | 1                   | 173                   | 2355.43        | <.001          |
| Time                          | 1                   | 173                   | 1.49           | 0.224          |
| Group                         | 1                   | 28                    | 0.20           | 0.655          |
| Gender                        | 1                   | 28                    | 10.87          | 0.003          |
| Sleep duration                | 1                   | 28                    | 10.63          | 0.003          |
| Sweets intake                 | 1                   | 28                    | 4.18           | 0.051          |
| Level of activity             | 1                   | 28                    | 8.59           | 0.007          |
| SSKJ 3-8 R                    | 1                   | 28                    | 1.00           | 0.326          |
| Physical stress symptoms      |                     |                       |                |                |
| SSKJ 3-8 R                    | 1                   | 28                    | 0.50           | 0.485          |
| stress vulnerability          |                     |                       |                |                |
| Time:Group                    | 1                   | 173                   | 2.27           | 0.134          |

**Table 25: Inferential statistics for salivary oxytocin in the ITT population**

| <b>lme model summary</b>                     |                         |                           |                |                |
|----------------------------------------------|-------------------------|---------------------------|----------------|----------------|
|                                              | <b>Estimate</b>         | <b>t-value</b>            | <b>DF</b>      | <b>p-value</b> |
| Intercept (placebo, before treatment)        | 1.190                   | 7.19                      | 34             | <.001          |
| time (after treatment)                       | -0.176                  | -2.12                     | 34             | 0.042          |
| 150 mg group                                 | 0.048                   | 0.37                      | 32             | 0.712          |
| <b>SSKJ 3-8 R</b>                            |                         |                           |                |                |
| stress coping strategy:                      |                         |                           |                |                |
| avoidant coping                              | 0.031                   | 1.83                      | 32             | 0.077          |
| <b>SSKJ 3-8 R</b>                            |                         |                           |                |                |
| stress coping strategy:                      |                         |                           |                |                |
| palliative emotion regulation                | 0.024                   | 1.42                      | 32             | 0.166          |
| time:150 mg                                  | 0.030                   | 0.26                      | 34             | 0.800          |
| <b>lme model summary without interaction</b> |                         |                           |                |                |
|                                              | <b>Estimate</b>         | <b>t-value</b>            | <b>DF</b>      | <b>p-value</b> |
| Intercept (placebo, before treatment)        | 1.182                   | 7.26                      | 35             | <.001          |
| time (after treatment)                       | -0.161                  | -2.78                     | 35             | 0.009          |
| 150 mg group                                 | 0.063                   | 0.55                      | 32             | 0.588          |
| <b>SSKJ 3-8 R</b>                            |                         |                           |                |                |
| stress coping strategy:                      |                         |                           |                |                |
| avoidant coping                              | 0.031                   | 1.83                      | 32             | 0.077          |
| <b>SSKJ 3-8 R</b>                            |                         |                           |                |                |
| stress coping strategy:                      |                         |                           |                |                |
| palliative emotion regulation                | 0.024                   | 1.42                      | 32             | 0.166          |
| <b>F-tests</b>                               |                         |                           |                |                |
|                                              | <b>Numerator<br/>DF</b> | <b>Denominator<br/>DF</b> | <b>F-value</b> | <b>p-value</b> |
| Intercept (placebo, before treatment)        | 1                       | 34                        | 778.2795       | <.001          |
| Time                                         | 1                       | 34                        | 7.5052         | 0.010          |
| Group                                        | 1                       | 32                        | 0.4414         | 0.511          |
| <b>SSKJ 3-8 R</b>                            | 1                       | 32                        | 7.8666         | 0.009          |
| stress coping strategy:                      |                         |                           |                |                |
| avoidant coping                              |                         |                           |                |                |
| <b>SSKJ 3-8 R</b>                            | 1                       | 32                        | 2.0133         | 0.166          |
| stress coping strategy:                      |                         |                           |                |                |
| palliative emotion regulation                |                         |                           |                |                |
| Time:Group                                   | 1                       | 34                        | 0.0655         | 0.800          |

### 3.4 Exploratory cognitive outcomes

**Table 26: Inferential statistics for secondary memory in the ITT population**

| <b>lme model summary</b>             |                     |                       |                |                |
|--------------------------------------|---------------------|-----------------------|----------------|----------------|
|                                      | <b>Estimate</b>     | <b>t-value</b>        | <b>DF</b>      | <b>p-value</b> |
| Intercept (placebo, baseline)        | 173.267             | 8.06                  | 68             | <.001          |
| 1hr post dose                        | -18.102             | -3.19                 | 68             | 0.002          |
| 2.5hr post dose                      | -13.472             | -2.38                 | 68             | 0.020          |
| 150 mg group                         | -2.674              | -0.29                 | 33             | 0.776          |
| Sleep quality                        | 4.321               | 1.63                  | 33             | 0.112          |
| Gender                               | 26.472              | 2.94                  | 33             | 0.006          |
| 1hr post dose:150 mg                 | 0.077               | 0.01                  | 68             | 0.992          |
| 2.5hr post dose:150 mg               | -9.072              | -1.13                 | 68             | 0.261          |
| <b>F-tests</b>                       |                     |                       |                |                |
|                                      | <b>Numerator DF</b> | <b>Denominator DF</b> | <b>F-value</b> | <b>p-value</b> |
| Intercept (placebo, baseline)        | 1                   | 68                    | 3109.13        | <.001          |
| Time                                 | 2                   | 68                    | 13.44          | <.001          |
| Group                                | 1                   | 33                    | 1.19           | 0.284          |
| Sleep quality                        | 1                   | 33                    | 5.12           | 0.030          |
| Gender                               | 1                   | 33                    | 8.59           | 0.006          |
| Time:group                           | 2                   | 68                    | 0.86           | 0.427          |
| <b>Post-hoc Tukey tests for time</b> |                     |                       |                |                |
|                                      | <b>Estimate</b>     | <b>z-value</b>        | <b>p-value</b> |                |
| 1hr post dose - baseline             | -18.078             | -4.528                | < 0.001        |                |
| 2.5hr post dose - baseline           | -18.023             | -4.514                | < 0.001        |                |
| 2.5hr post dose - 1hr post dose      | 0.055               | 0.014                 | 1              |                |

**Table 27: Inferential statistics for working memory in the ITT population, outcome was square transformed**

| <b>lme model summary</b>      |                     |                       |                |                |
|-------------------------------|---------------------|-----------------------|----------------|----------------|
|                               | <b>Estimate</b>     | <b>t-value</b>        | <b>DF</b>      | <b>p-value</b> |
| Intercept (placebo, baseline) | 34416.9             | 28.34                 | 64             | <.001          |
| 1hr post dose                 | 2409.693            | 2.89                  | 64             | 0.005          |
| 2.5hr post dose               | 1078.681            | 1.34                  | 64             | 0.184          |
| 150 mg group                  | 2338.597            | 2.70                  | 32             | 0.011          |
| BFP                           | -146.788            | -3.44                 | 32             | 0.002          |
| SSKJ 3-8 R                    |                     |                       |                |                |
| stress coping strategies:     |                     |                       |                |                |
| seeking social support        | 210.920             | 2.49                  | 32             | 0.018          |
| SSKJ 3-8 R                    |                     |                       |                |                |
| Psychological stress symptoms |                     |                       |                |                |
| sadness                       | 54.783              | 0.28                  | 32             | 0.778          |
| 1hr post dose:150 mg          | -2527.030           | -2.21                 | 64             | 0.03           |
| 2.5hr post dose:150 mg        | -1255.140           | -1.12                 | 64             | 0.266          |
| <b>F-tests</b>                |                     |                       |                |                |
|                               | <b>Numerator DF</b> | <b>Denominator DF</b> | <b>F-value</b> | <b>p-value</b> |
| Intercept (placebo, baseline) | 1                   | 64                    | 15141.08       | <.001          |
| Time                          | 2                   | 64                    | 1.97           | 0.148          |
| Group                         | 1                   | 32                    | 2.24           | 0.144          |
| BFP                           | 1                   | 32                    | 10.41          | 0.003          |
| SSKJ 3-8 R                    | 1                   | 32                    | 7.09           | 0.012          |
| stress coping strategies:     |                     |                       |                |                |
| seeking social support        |                     |                       |                |                |
| SSKJ 3-8 R                    | 1                   | 32                    | 0.06           | 0.807          |
| Psychological stress symptoms |                     |                       |                |                |
| sadness                       |                     |                       |                |                |
| Time:group                    | 2                   | 64                    | 2.46           | 0.094          |

**Table 28: Inferential statistics for speed of memory in the ITT population, outcome was log transformed**

| <b>lme model summary</b>             |                     |                       |                |                |
|--------------------------------------|---------------------|-----------------------|----------------|----------------|
|                                      | <b>Estimate</b>     | <b>t-value</b>        | <b>DF</b>      | <b>p-value</b> |
| Intercept (placebo, baseline)        | 8.441               | 57.98                 | 66             | <.001          |
| 1hr post dose                        | -0.02               | -0.89                 | 66             | 0.376          |
| 2.5hr post dose                      | -0.068              | -3.00                 | 66             | 0.004          |
| 150 mg group                         | -0.007              | -0.15                 | 32             | 0.879          |
| Weight                               | -0.004              | -1.83                 | 32             | 0.077          |
| Fruit and vegetable intake           | -0.022              | -2.03                 | 32             | 0.051          |
| Sweets intake                        | 0.021               | 1.92                  | 32             | 0.064          |
| 1hr post dose:150 mg                 | 0.03                | 0.96                  | 66             | 0.343          |
| 2.5hr post dose:150 mg               | 0.052               | 1.63                  | 66             | 0.108          |
| <b>F-tests</b>                       |                     |                       |                |                |
|                                      | <b>Numerator DF</b> | <b>Denominator DF</b> | <b>F-value</b> | <b>p-value</b> |
| Intercept (placebo, baseline)        | 1                   | 66                    | 160852.5       | <.001          |
| Time                                 | 2                   | 66                    | 4.19           | 0.019          |
| Group                                | 1                   | 32                    | 0.14           | 0.716          |
| Weight                               | 1                   | 32                    | 4.08           | 0.052          |
| Fruit and vegetable intake           | 1                   | 32                    | 4.94           | 0.033          |
| Sweets intake                        | 1                   | 32                    | 3.62           | 0.066          |
| Time:group                           | 2                   | 66                    | 1.34           | 0.269          |
| <b>Post-hoc Tukey tests for time</b> |                     |                       |                |                |
|                                      | <b>Estimate</b>     | <b>z-value</b>        | <b>p-value</b> |                |
| 1hr post dose - baseline             | -0.005              | -0.301                | 0.951          |                |
| 2.5hr post dose - baseline           | -0.042              | -2.599                | 0.025          |                |
| 2.5hr post dose - 1hr post dose      | -0.037              | -2.301                | 0.056          |                |

**Table 29: Inferential statistics for accuracy of attention in the ITT population**

| <b>lme model summary</b>      |                 |                |           |                |
|-------------------------------|-----------------|----------------|-----------|----------------|
|                               | <b>Estimate</b> | <b>t-value</b> | <b>DF</b> | <b>p-value</b> |
| Intercept (placebo, baseline) | 93.883          | 111.26         | 68        | <.001          |
| 1hr post dose                 | 0.402           | 0.44           | 68        | 0.662          |
| 2.5hr post dose               | 0.512           | 0.56           | 68        | 0.577          |
| 150 mg group                  | 0.41            | 0.35           | 35        | 0.73           |
| 1hr post dose:150 mg          | -0.588          | -0.46          | 68        | 0.65           |
| 2.5hr post dose:150 mg        | -1.983          | -1.54          | 68        | 0.129          |

  

| <b>F-tests</b>                |                     |                       |                |                |
|-------------------------------|---------------------|-----------------------|----------------|----------------|
|                               | <b>Numerator DF</b> | <b>Denominator DF</b> | <b>F-value</b> | <b>p-value</b> |
| Intercept (placebo, baseline) | 1                   | 68                    | 41493.89       | <.001          |
| Time                          | 2                   | 68                    | 0.47           | 0.628          |
| Group                         | 1                   | 35                    | 0.22           | 0.642          |
| Time:group                    | 2                   | 68                    | 1.24           | 0.294          |

**Table 30: Inferential statistics for speed of attention in the ITT population**

| <b>lme model summary</b>      |                     |                       |                |                |
|-------------------------------|---------------------|-----------------------|----------------|----------------|
|                               | <b>Estimate</b>     | <b>t-value</b>        | <b>DF</b>      | <b>p-value</b> |
| Intercept (placebo, baseline) | 1472.81             | 14.47                 | 67             | <.001          |
| 1hr post dose                 | 8.34                | 0.54                  | 67             | 0.593          |
| 2.5hr post dose               | 34.496              | 2.22                  | 67             | 0.030          |
| 150 mg group                  | 13.856              | 0.41                  | 30             | 0.682          |
| PDS                           | -26.347             | -1.40                 | 30             | 0.173          |
| Weight                        | -1.800              | -1.10                 | 30             | 0.280          |
| Fruit and vegetable intake    | -9.446              | -1.17                 | 30             | 0.252          |
| Sweets intake                 | 15.475              | 1.93                  | 30             | 0.063          |
| SSKJ 3-8 R                    |                     |                       |                |                |
| Psychological stress symptoms |                     |                       |                |                |
| sadness                       | 10.322              | 1.20                  | 30             | 0.238          |
| 1hr post dose:150 mg          | 6.587               | 0.30                  | 67             | 0.767          |
| 2.5hr post dose:150 mg        | -24.911             | -1.13                 | 67             | 0.265          |
| <b>F-tests</b>                |                     |                       |                |                |
|                               | <b>Numerator DF</b> | <b>Denominator DF</b> | <b>F-value</b> | <b>p-value</b> |
| Intercept (placebo, baseline) | 1                   | 67                    | 8912.48        | <.001          |
| Time                          | 2                   | 67                    | 2.08           | 0.133          |
| Group                         | 1                   | 30                    | 0.15           | 0.703          |
| PDS                           | 1                   | 30                    | 4.22           | 0.049          |
| Weight                        | 1                   | 30                    | 1.56           | 0.222          |
| Fruit and vegetable intake    | 1                   | 30                    | 3.37           | 0.076          |
| Sweets intake                 | 1                   | 30                    | 5.32           | 0.028          |
| SSKJ 3-8 R                    | 1                   | 30                    | 1.43           | 0.241          |
| Psychological stress symptoms |                     |                       |                |                |
| sadness                       |                     |                       |                |                |
| Time:group                    | 2                   | 67                    | 1.14           | 0.325          |

**Table 31: Inferential statistics for Picture Recognition Original Stimuli Accuracy in the ITT population, outcome was square transformed**

| <b>Linear mixed effects model summary</b> |                     |                       |                |                |
|-------------------------------------------|---------------------|-----------------------|----------------|----------------|
|                                           | <b>Estimate</b>     | <b>t-value</b>        | <b>DF</b>      | <b>p-value</b> |
| Intercept (placebo, baseline)             | 6455.795            | 9.02                  | 66             | <.001          |
| 1hr post dose                             | -613.889            | -1.39                 | 66             | 0.170          |
| 2.5hr post dose                           | 52.963              | 0.12                  | 66             | 0.907          |
| 150 mg                                    | -364.779            | -0.67                 | 34             | 0.507          |
| Gender                                    | 802.946             | 1.78                  | 34             | 0.084          |
| 1hr post dose:150 mg                      | 39.998              | 0.06                  | 66             | 0.949          |
| 2.5hr post dose:150 mg                    | -73.752             | -0.12                 | 66             | 0.908          |
| <b>F-tests</b>                            |                     |                       |                |                |
|                                           | <b>Numerator DF</b> | <b>Denominator DF</b> | <b>F-value</b> | <b>p-value</b> |
| Intercept (placebo, baseline)             | 1                   | 66                    | 1189.1941      | <.001          |
| Time                                      | 2                   | 66                    | 2.4478         | 0.094          |
| Group                                     | 1                   | 34                    | 1.064          | 0.310          |
| Gender                                    | 1                   | 34                    | 3.1773         | 0.084          |
| Time:group                                | 2                   | 66                    | 0.0163         | 0.984          |



**Table 32: Inferential statistics for Picture Recognition New Stimuli Accuracy in the ITT population**

| <b>Linear mixed effects model summary</b> |                     |                       |                |                |
|-------------------------------------------|---------------------|-----------------------|----------------|----------------|
|                                           | <b>Estimate</b>     | <b>t-value</b>        | <b>DF</b>      | <b>p-value</b> |
| Intercept (placebo, baseline)             | 85.44456            | 18.01                 | 68             | <.001          |
| 1hr post dose                             | -5.83333            | -1.95                 | 68             | 0.056          |
| 2.5hr post dose                           | -5.27778            | -1.76                 | 68             | 0.082          |
| 150 mg                                    | -3.95199            | -1.09                 | 33             | 0.282          |
| Sweets intake                             | 1.64586             | 2.36                  | 33             | 0.024          |
| SSKJ 3-8 R                                |                     |                       |                |                |
| Palliative emotion regulation             | -0.71427            | -1.97                 | 33             | 0.057          |
| 1hr post dose:150 mg                      | 0.63935             | 0.15                  | 68             | 0.880          |
| 2.5hr post dose:150 mg                    | 1.68935             | 0.40                  | 68             | 0.690          |
| <b>F-tests</b>                            |                     |                       |                |                |
|                                           | <b>Numerator DF</b> | <b>Denominator DF</b> | <b>F-value</b> | <b>p-value</b> |
| Intercept (placebo, baseline)             | 1                   | 68                    | 3564.589       | <.001          |
| Time                                      | 2                   | 68                    | 3.977          | 0.023          |
| Group                                     | 1                   | 33                    | 2.756          | 0.106          |
| Sweets intake                             | 1                   | 33                    | 4.774          | 0.036          |
| SSKJ 3-8 R                                | 1                   | 33                    | 3.862          | 0.058          |
| Palliative emotion regulation             |                     |                       |                |                |
| Time:group                                | 2                   | 68                    | 0.082          | 0.922          |
| <b>Post-hoc Tukey tests for time</b>      |                     |                       |                |                |
|                                           | <b>Estimate</b>     | <b>z-value</b>        | <b>p-value</b> |                |
| 1hr post dose - baseline                  | -5.508              | -2.647                | 0.0219         |                |
| 2.5hr post dose - baseline                | -4.427              | -2.128                | 0.0843         |                |
| 2.5hr post dose - 1hr post dose           | 1.081               | 0.517                 | 0.8629         |                |
