# Supplementary material for: Assessment of the Effects of a Sage (Salvia officinalis) Extract on Cognitive Performance in Adolescents and Young Adults
Source: bioRxiv or medRxiv preprint supplement (doi:10.1101/2021.05.28.21257776), 2021-05-30
Supplement: Supplementary file [file media-4.pdf]

## 4 Supplementary Data File S4

### Contents

|     |                                                     |    |
|-----|-----------------------------------------------------|----|
| 4   | Supplementary Data File S4.....                     | 1  |
| 4.1 | Baseline characteristics and control variables..... | 2  |
| 4.2 | Cognitive outcomes .....                            | 3  |
| 4.3 | Physiological outcomes.....                         | 22 |
| 4.4 | Exploratory cognitive outcomes.....                 | 27 |

#### 4.1 Baseline characteristics and control variables

**Table 1: Inferential statistics for baseline characteristics and control variables**

| <b>F-tests for continuous control variables</b>              |                     |                       |                |                |
|--------------------------------------------------------------|---------------------|-----------------------|----------------|----------------|
| <b>Control variable</b>                                      | <b>Numerator DF</b> | <b>Denominator DF</b> | <b>F-value</b> | <b>p-value</b> |
| TICS chronic stress screening scale                          | 2                   | 33                    | 2.895          | 0.069          |
| CAR increase                                                 | 2                   | 33                    | 1.418          | 0.257          |
| Sleep quality                                                | 2                   | 33                    | 0.472          | 0.628          |
| Sleep duration                                               | 2                   | 33                    | 0.570          | 0.571          |
| Fruit and vegetable intake                                   | 2                   | 33                    | 0.147          | 0.864          |
| Sweets intake                                                | 2                   | 33                    | 0.179          | 0.837          |
| Level of activity                                            | 2                   | 33                    | 0.282          | 0.756          |
| Weight                                                       | 2                   | 33                    | 0.055          | 0.947          |
| BMI                                                          | 2                   | 33                    | 0.236          | 0.791          |
| WHR                                                          | 2                   | 33                    | 0.365          | 0.697          |
| BFP                                                          | 2                   | 33                    | 0.722          | 0.493          |
| MP                                                           | 2                   | 33                    | 0.658          | 0.525          |
| <b>Fisher's exact test for categorical control variables</b> |                     |                       |                |                |
|                                                              |                     |                       |                | <b>p-value</b> |
| Gender                                                       |                     |                       |                | 0.903          |
| <b>Post-hoc Welch t-tests for TICS SCCS</b>                  |                     |                       |                |                |
|                                                              |                     | <b>DF</b>             | <b>t-value</b> | <b>p-value</b> |
| Placebo vs 150 mg group                                      |                     | <b>18.51</b>          | 0.12           | 0.904          |
| Placebo vs 300 mg group                                      |                     | 17.65                 | -2.12          | 0.049          |

## 4.2 Cognitive outcomes

**Table 2: Inferential statistics for Picture Recognition Accuracy in the ITT population, outcome was square transformed**

| <b>Linear mixed effects model summary</b> |                     |                       |                |                |
|-------------------------------------------|---------------------|-----------------------|----------------|----------------|
|                                           | <b>Estimate</b>     | <b>t-value</b>        | <b>DF</b>      | <b>p-value</b> |
| Intercept (placebo, baseline)             | 4714.485            | 4.86                  | 64             | <.001          |
| 1hr post dose                             | -99.279             | -0.22                 | 64             | 0.823          |
| 2.5hr post dose                           | 319.992             | 0.72                  | 64             | 0.472          |
| 150 mg group                              | 383.811             | 0.61                  | 29             | 0.545          |
| 300 mg group                              | 358.749             | 0.55                  | 29             | 0.589          |
| CAR increase                              | 58.502              | 1.96                  | 29             | 0.060          |
| BFP                                       | 16.279              | 0.59                  | 29             | 0.557          |
| TICS social overload                      | 101.760             | 1.93                  | 29             | 0.063          |
| Gender                                    | 360.789             | 0.70                  | 29             | 0.492          |
| 1hr post dose:150 mg                      | -237.179            | -0.38                 | 64             | 0.702          |
| 2.5hr post dose:150 mg                    | -868.950            | -1.41                 | 64             | 0.163          |
| 1hr post dose:300 mg                      | 174.458             | 0.28                  | 64             | 0.781          |
| 2.5hr post dose:300 mg                    | -115.646            | -0.19                 | 64             | 0.854          |
| <b>F-tests</b>                            |                     |                       |                |                |
|                                           | <b>Numerator DF</b> | <b>Denominator DF</b> | <b>F-value</b> | <b>p-value</b> |
| Intercept (placebo, baseline)             | 1                   | 64                    | 1314.48        | <.001          |
| Time                                      | 2                   | 64                    | 0.20           | 0.817          |
| Group                                     | 2                   | 29                    | 0.48           | 0.624          |
| CAR increase                              | 1                   | 29                    | 4.41           | 0.044          |
| BFP                                       | 1                   | 29                    | 2.63           | 0.116          |
| TICS social overload                      | 1                   | 29                    | 3.96           | 0.056          |
| Gender                                    | 1                   | 29                    | 0.48           | 0.493          |
| Time:group                                | 4                   | 64                    | 0.65           | 0.628          |

**Table 3: Inferential statistics for Picture Recognition Accuracy in the PP population**

| <b>Linear mixed effects model summary</b> |                     |                       |                |                |
|-------------------------------------------|---------------------|-----------------------|----------------|----------------|
|                                           | <b>Estimate</b>     | <b>t-value</b>        | <b>DF</b>      | <b>p-value</b> |
| Intercept (placebo, baseline)             | 68.499              | 11.61                 | 60             | <.001          |
| 1hr post dose                             | -1.111              | -0.39                 | 60             | 0.696          |
| 2.5hr post dose                           | 0.833               | 0.29                  | 60             | 0.770          |
| 150 mg group                              | 2.827               | 0.67                  | 27             | 0.506          |
| 300 mg group                              | 1.377               | 0.32                  | 27             | 0.749          |
| CAR increase                              | 0.188               | 1.05                  | 27             | 0.301          |
| BFP                                       | 0.499               | 2.57                  | 27             | 0.016          |
| TICS social overload                      | 0.650               | 1.88                  | 27             | 0.071          |
| 1hr post dose:150 mg                      | -0.972              | -0.26                 | 60             | 0.796          |
| 2.5hr post dose:150 mg                    | -4.167              | -1.11                 | 60             | 0.271          |
| 1hr post dose:300 mg                      | 2.778               | 0.74                  | 60             | 0.462          |
| 2.5hr post dose:300 mg                    | 1.667               | 0.44                  | 60             | 0.658          |
| <b>F-tests</b>                            |                     |                       |                |                |
|                                           | <b>Numerator DF</b> | <b>Denominator DF</b> | <b>F-value</b> | <b>p-value</b> |
| Intercept (placebo, baseline)             | 1                   | 60                    | 4084.814       | <.001          |
| Time                                      | 2                   | 60                    | 0.054          | 0.947          |
| Group                                     | 2                   | 27                    | 0.375          | 0.691          |
| CAR increase                              | 1                   | 27                    | 4.630          | 0.041          |
| BFP                                       | 1                   | 27                    | 6.217          | 0.019          |
| TICS social overload                      | 1                   | 27                    | 3.531          | 0.071          |
| Time:group                                | 4                   | 60                    | 0.832          | 0.510          |

**Table 4: Inferential statistics for Picture Recognition Reaction Time in the ITT population**

| <b>Linear mixed effects model summary</b> |                     |                       |                |                |
|-------------------------------------------|---------------------|-----------------------|----------------|----------------|
|                                           | <b>Estimate</b>     | <b>t-value</b>        | <b>DF</b>      | <b>p-value</b> |
| Intercept (placebo, baseline)             | 1166.708            | 17.01                 | 63             | <.001          |
| 1hr post dose                             | -29.812             | -0.96                 | 63             | 0.341          |
| 2.5hr post dose                           | -68.748             | -2.15                 | 63             | 0.036          |
| 150 mg group                              | 80.334              | 1.50                  | 29             | 0.144          |
| 300 mg group                              | 18.374              | 0.32                  | 29             | 0.750          |
| TICS chronic stress                       | 5.318               | 2.47                  | 29             | 0.020          |
| Level of activity                         | -33.875             | -3.27                 | 29             | 0.003          |
| Sleep disruptions                         | -117.785            | -2.75                 | 29             | 0.010          |
| 1hr post dose:150 mg                      | -51.673             | -1.18                 | 63             | 0.244          |
| 2.5hr post dose:150 mg                    | -36.035             | -0.81                 | 63             | 0.422          |
| 1hr post dose:300 mg                      | -5.716              | -0.13                 | 63             | 0.899          |
| 2.5hr post dose:300 mg                    | 17.903              | 0.39                  | 63             | 0.696          |
| <b>F-tests</b>                            |                     |                       |                |                |
|                                           | <b>Numerator DF</b> | <b>Denominator DF</b> | <b>F-value</b> | <b>p-value</b> |
| Intercept (placebo, baseline)             | 1                   | 63                    | 2861.283       | <.001          |
| Time                                      | 2                   | 63                    | 8.889          | 0.004          |
| Group                                     | 2                   | 29                    | 0.204          | 0.817          |
| TICS chronic stress                       | 1                   | 29                    | 7.211          | 0.012          |
| Level of activity                         | 1                   | 29                    | 7.882          | 0.009          |
| Sleep disruptions                         | 1                   | 29                    | 7.564          | 0.010          |
| Time:group                                | 4                   | 63                    | 0.575          | 0.682          |
| <b>Post-hoc Tukey tests for time</b>      |                     |                       |                |                |
|                                           | <b>Estimate</b>     | <b>z-value</b>        | <b>p-value</b> |                |
| 1hr post dose - baseline                  | -49.32              | -2.746                | 0.017          |                |
| 2.5hr post dose - baseline                | -75.68              | -4.169                | <0.001         |                |
| 2.5hr post dose - 1hr post dose           | -26.35              | -1.452                | 0.314          |                |

**Table 5: Inferential statistics for Word Recognition Accuracy in the ITT population**

| <b>Linear mixed effects model summary</b> |                     |                       |                |                |
|-------------------------------------------|---------------------|-----------------------|----------------|----------------|
|                                           | <b>Estimate</b>     | <b>t-value</b>        | <b>DF</b>      | <b>p-value</b> |
| Intercept (placebo, baseline)             | 97.101              | 15.60                 | 65             | <.001          |
| 1hr post dose                             | -2.768              | -0.91                 | 65             | 0.365          |
| 2.5hr post dose                           | -5.219              | -1.77                 | 65             | 0.081          |
| 150 mg group                              | -3.66               | -0.93                 | 32             | 0.360          |
| 300 mg group                              | 0.514               | 0.13                  | 32             | 0.897          |
| Weight                                    | -0.163              | -2.11                 | 32             | 0.043          |
| 1hr post dose:150 mg                      | 1.082               | 0.26                  | 65             | 0.799          |
| 2.5hr post dose:150 mg                    | -1.329              | -0.32                 | 65             | 0.750          |
| 1hr post dose:300 mg                      | 1.1400              | 0.27                  | 65             | 0.788          |
| 2.5hr post dose:300 mg                    | 3.314               | 0.80                  | 65             | 0.429          |
| <b>F-tests</b>                            |                     |                       |                |                |
|                                           | <b>Numerator DF</b> | <b>Denominator DF</b> | <b>F-value</b> | <b>p-value</b> |
| Intercept (placebo, baseline)             | 1                   | 65                    | 4155.099       | <.001          |
| Time                                      | 2                   | 65                    | 3.627          | 0.032          |
| Group                                     | 2                   | 32                    | 1.603          | 0.217          |
| Weight                                    | 1                   | 32                    | 4.410          | 0.044          |
| Time:group                                | 4                   | 65                    | 0.438          | 0.781          |
| <b>Post-hoc Tukey tests for time</b>      |                     |                       |                |                |
|                                           | <b>Estimate</b>     | <b>z-value</b>        | <b>p-value</b> |                |
| 1hr post dose - baseline                  | -2.019              | -1.196                | 0.455          |                |
| 2.5hr post dose - baseline                | -4.557              | -2.727                | 0.018          |                |
| 2.5hr post dose - 1hr post dose           | -2.538              | -1.504                | 0.289          |                |

**Table 6: Inferential statistics for Word Recognition Reaction Time in the ITT population**

| <b>Linear mixed effects model summary</b> |                     |                       |                |                |
|-------------------------------------------|---------------------|-----------------------|----------------|----------------|
|                                           | <b>Estimate</b>     | <b>t-value</b>        | <b>DF</b>      | <b>p-value</b> |
| Intercept (placebo, baseline)             | 632.365             | 7                     | 65             | <.0001         |
| 1hr post dose                             | -1.263              | -0.04                 | 65             | 0.965          |
| 2.5hr post dose                           | 14.047              | 0.48                  | 65             | 0.631          |
| 150 mg group                              | 25.945              | 0.73                  | 29             | 0.473          |
| 300 mg group                              | -1.325              | -0.04                 | 29             | 0.971          |
| Sleep disruptions                         | -85.135             | -3.69                 | 29             | 0.001          |
| Sleep quality                             | 18.649              | 2.33                  | 29             | 0.027          |
| Sweets intake                             | 0.604               | 0.09                  | 29             | 0.925          |
| TICS pressure to succeed                  | 5.733               | 2.8                   | 29             | 0.009          |
| 1hr post dose:150 mg                      | 13.402              | 0.32                  | 65             | 0.749          |
| 2.5hr post dose:150 mg                    | -26.49              | -0.64                 | 65             | 0.528          |
| 1hr post dose:300 mg                      | 38.814              | 0.94                  | 65             | 0.349          |
| 2.5hr post dose:300 mg                    | 38.023              | 0.92                  | 65             | 0.359          |
| <b>F-tests</b>                            |                     |                       |                |                |
|                                           | <b>Numerator DF</b> | <b>Denominator DF</b> | <b>F-value</b> | <b>p-value</b> |
| Intercept (placebo, baseline)             | 1                   | 65                    | 6089.959       | <.001          |
| Time                                      | 2                   | 65                    | 0.691          | 0.505          |
| Group                                     | 2                   | 29                    | 0.355          | 0.704          |
| Sleep disruptions                         | 1                   | 29                    | 17.373         | <.001          |
| Sleep quality                             | 1                   | 29                    | 5.782          | 0.023          |
| Sweets intake                             | 1                   | 29                    | 3.633          | 0.067          |
| TICS pressure to succeed                  | 1                   | 29                    | 7.824          | 0.009          |
| Time:group                                | 4                   | 65                    | 0.764          | 0.552          |

**Table 7: Inferential statistics for Immediate Word Recall Accuracy in the ITT population**

| <b>Linear mixed effects model summary</b> |                     |                       |                |                |
|-------------------------------------------|---------------------|-----------------------|----------------|----------------|
|                                           | <b>Estimate</b>     | <b>t-value</b>        | <b>DF</b>      | <b>p-value</b> |
| Intercept (placebo, baseline)             | 70.025              | 5.42                  | 66             | <.001          |
| 1hr post dose                             | -15.357             | -4.17                 | 66             | <.001          |
| 2.5hr post dose                           | -6.189              | -1.68                 | 66             | 0.098          |
| 150 mg group                              | -8.557              | -1.64                 | 30             | 0.112          |
| 300 mg group                              | -1.313              | -0.24                 | 30             | 0.811          |
| Weight                                    | -0.163              | -1.46                 | 30             | 0.155          |
| Gender                                    | 6.73                | 1.63                  | 30             | 0.114          |
| TICS social overload                      | -1.082              | -2.38                 | 30             | 0.024          |
| 1hr post dose:150 mg                      | 14.88               | 2.85                  | 66             | 0.006          |
| 2.5hr post dose:150 mg                    | 2.617               | 0.50                  | 66             | 0.617          |
| 1hr post dose:300 mg                      | 10.437              | 2.00                  | 66             | 0.049          |
| 2.5hr post dose:300 mg                    | 5.157               | 0.99                  | 66             | 0.326          |
| <b>F-tests</b>                            |                     |                       |                |                |
|                                           | <b>Numerator DF</b> | <b>Denominator DF</b> | <b>F-value</b> | <b>p-value</b> |
| Intercept (placebo, baseline)             | 1                   | 66                    | 996.778        | <.001          |
| Time                                      | 2                   | 66                    | 5.285          | 0.007          |
| Group                                     | 2                   | 30                    | 0.311          | 0.735          |
| Weight                                    | 1                   | 30                    | 5.122          | 0.031          |
| Gender                                    | 1                   | 30                    | 1.353          | 0.254          |
| TICS social overload                      | 1                   | 30                    | 5.676          | 0.024          |
| Time:group                                | 4                   | 66                    | 2.522          | 0.049          |
| <b>Post-hoc Tukey tests for time</b>      |                     |                       |                |                |
|                                           | <b>Estimate</b>     | <b>z-value</b>        | <b>p-value</b> |                |
| 1hr post dose - baseline                  | -6.918              | -3.117                | 0.005          |                |
| 2.5hr post dose - baseline                | -3.598              | -1.621                | 0.237          |                |
| 2.5hr post dose - 1hr post dose           | 3.320               | 1.496                 | 0.293          |                |



**Table 8: Inferential statistics for Immediate Word Recall Errors in the ITT population**

| <b>glm model summary</b>      |                 |                |           |                |
|-------------------------------|-----------------|----------------|-----------|----------------|
|                               | <b>Estimate</b> | <b>z-value</b> | <b>DF</b> | <b>p-value</b> |
| Intercept (placebo, baseline) | -4.810          | -3.660         | 60        | <.001          |
| 1hr post dose                 | 2.212           | 1.796          | 60        | 0.073          |
| 2.5hr post dose               | 1.370           | 1.080          | 60        | 0.290          |
| 150 mg group                  | 1.551           | 1.205          | 27        | 0.228          |
| 300 mg group                  | 0.647           | 0.495          | 27        | 0.621          |
| TICS pressure to succeed      | 0.137           | 2.129          | 27        | 0.033          |
| TICS social overload          | 0.037           | 0.460          | 27        | 0.646          |
| TICS work overload            | 0.016           | 0.327          | 27        | 0.744          |
| 1hr post dose:150 mg          | -4.411          | -2.366         | 60        | 0.018          |
| 2.5hr post dose:150 mg        | -2.558          | -1.503         | 60        | 0.133          |
| 1hr post dose:300 mg          | -1.726          | -1.093         | 60        | 0.275          |
| 2.5hr post dose:300 mg        | -1.370          | -0.838         | 60        | 0.402          |

  

| <b>LR-tests</b>          |           |                           |                |
|--------------------------|-----------|---------------------------|----------------|
|                          | <b>DF</b> | <b>LR Chisquare-value</b> | <b>p-value</b> |
| Time                     | 2         | 0.4661                    | 0.792          |
| Group                    | 2         | 1.2919                    | 0.524          |
| TICS pressure to succeed | 1         | 5.0910                    | 0.024          |
| TICS social overload     | 1         | 0.2107                    | 0.646          |
| TICS work overload       | 1         | 0.1067                    | 0.744          |
| Time:group               | 4         | 7.1263                    | 0.129          |

**Table 9: Inferential statistics for Delayed Word Recall Accuracy in the ITT population**

| <b>Linear mixed effects model summary</b> |                     |                       |                |                |
|-------------------------------------------|---------------------|-----------------------|----------------|----------------|
|                                           | <b>Estimate</b>     | <b>t-value</b>        | <b>DF</b>      | <b>p-value</b> |
| Intercept (placebo, baseline)             | 60.722              | 8.72                  | 66             | <.001          |
| 1hr post dose                             | -14.244             | -3.03                 | 66             | 0.004          |
| 2.5hr post dose                           | -18.098             | -3.85                 | 66             | <.001          |
| 150 mg group                              | -8.789              | -1.25                 | 32             | 0.221          |
| 300 mg group                              | -3.317              | -0.46                 | 32             | 0.647          |
| TICS pressure to succeed                  | -0.754              | -1.97                 | 32             | 0.058          |
| 1hr post dose:150 mg                      | 7.22                | 1.08                  | 66             | 0.282          |
| 2.5hr post dose:150 mg                    | 5.797               | 0.87                  | 66             | 0.387          |
| 1hr post dose:300 mg                      | 2.737               | 0.41                  | 66             | 0.682          |
| 2.5hr post dose:300 mg                    | 12.144              | 1.82                  | 66             | 0.073          |
| <b>F-tests</b>                            |                     |                       |                |                |
|                                           | <b>Numerator DF</b> | <b>Denominator DF</b> | <b>F-value</b> | <b>p-value</b> |
| Intercept (placebo, baseline)             | 1                   | 66                    | 252.050        | <.001          |
| Time                                      | 2                   | 66                    | 12.080         | <.001          |
| Group                                     | 2                   | 32                    | 0.495          | 0.614          |
| TICS pressure to succeed                  | 1                   | 32                    | 3.865          | 0.058          |
| Time:group                                | 4                   | 66                    | 1.276          | 0.288          |
| <b>Post-hoc Tukey tests for time</b>      |                     |                       |                |                |
|                                           | <b>Estimate</b>     | <b>z-value</b>        | <b>p-value</b> |                |
| 1hr post dose - baseline                  | -10.925             | -3.989                | <.001          |                |
| 2.5hr post dose - baseline                | -12.117             | -4.424                | <.001          |                |
| 2.5hr post dose - 1hr post dose           | -1.192              | -0.435                | 0.901          |                |

**Table 10: Inferential statistics for Delayed Word Recall Errors in the ITT population, outcome was log transformed after adding 1 to each value**

| <b>Linear mixed effects model summary</b> |                     |                       |                |                |
|-------------------------------------------|---------------------|-----------------------|----------------|----------------|
|                                           | <b>Estimate</b>     | <b>t-value</b>        | <b>DF</b>      | <b>p-value</b> |
| Intercept (placebo, baseline)             | 0.011               | 0.04                  | 56             | 0.971          |
| 1hr post dose                             | -0.044              | -0.21                 | 56             | 0.833          |
| 2.5hr post dose                           | 0.441               | 2.31                  | 56             | 0.024          |
| 150 mg group                              | -0.096              | -0.43                 | 28             | 0.669          |
| 300 mg group                              | -0.177              | -0.82                 | 28             | 0.418          |
| Sweets intake                             | -0.002              | -0.07                 | 28             | 0.948          |
| TICS work overload                        | 0.011               | 1.02                  | 28             | 0.318          |
| TICS social overload                      | 0.015               | 0.73                  | 28             | 0.473          |
| TICS pressure to succeed                  | 0.018               | 1.16                  | 28             | 0.257          |
| TICS social isolation                     | -0.003              | -0.17                 | 28             | 0.867          |
| 1hr post dose:150 mg                      | 0.101               | 0.35                  | 56             | 0.728          |
| 2.5hr post dose:150 mg                    | -0.436              | -1.59                 | 56             | 0.118          |
| 1hr post dose:300 mg                      | 0.172               | 0.6                   | 56             | 0.549          |
| 2.5hr post dose:300 mg                    | -0.341              | -1.28                 | 56             | 0.206          |
| <b>F-tests</b>                            |                     |                       |                |                |
|                                           | <b>Numerator DF</b> | <b>Denominator DF</b> | <b>F-value</b> | <b>p-value</b> |
| Intercept (placebo, baseline)             | 1                   | 56                    | 71.467         | <.001          |
| Time                                      | 2                   | 56                    | 1.963          | 0.150          |
| Group                                     | 2                   | 28                    | 1.503          | 0.240          |
| Sweets intake                             | 1                   | 28                    | 3.635          | 0.067          |
| TICS work overload                        | 1                   | 28                    | 2.834          | 0.103          |
| TICS social overload                      | 1                   | 28                    | 1.726          | 0.200          |
| TICS pressure to succeed                  | 1                   | 28                    | 1.422          | 0.243          |
| TICS social isolation                     | 1                   | 28                    | 0.007          | 0.935          |
| Time:group                                | 4                   | 56                    | 1.308          | 0.278          |

**Table 11: Inferential statistics for Numeric Working Memory Accuracy in the ITT population**

| <b>Linear mixed effects model summary</b> |                     |                       |                |                |
|-------------------------------------------|---------------------|-----------------------|----------------|----------------|
|                                           | <b>Estimate</b>     | <b>t-value</b>        | <b>DF</b>      | <b>p-value</b> |
| Intercept (placebo, baseline)             | 95.399              | 50.51                 | 62             | <.001          |
| 1hr post dose                             | -0.84               | -0.58                 | 62             | 0.567          |
| 2.5hr post dose                           | -0.606              | -0.41                 | 62             | 0.685          |
| 150 mg group                              | -2.585              | -1.59                 | 31             | 0.122          |
| 300 mg group                              | 0.034               | 0.02                  | 31             | 0.983          |
| Sleep disruptions                         | -2.122              | -2.18                 | 31             | 0.037          |
| Fruit and vegetable intake                | 0.422               | 1.64                  | 31             | 0.111          |
| 1hr post dose:150 mg                      | 2.786               | 1.35                  | 62             | 0.182          |
| 2.5hr post dose:150 mg                    | 2.086               | 1.00                  | 62             | 0.321          |
| 1hr post dose:300 mg                      | 2.506               | 1.23                  | 62             | 0.224          |
| 2.5hr post dose:300 mg                    | 1.161               | 0.56                  | 62             | 0.574          |
| <b>F-tests</b>                            |                     |                       |                |                |
|                                           | <b>Numerator DF</b> | <b>Denominator DF</b> | <b>F-value</b> | <b>p-value</b> |
| Intercept (placebo, baseline)             | 1                   | 62                    | 47155.21       | <.001          |
| Time                                      | 2                   | 62                    | 0.65           | 0.525          |
| Group                                     | 2                   | 31                    | 2.55           | 0.094          |
| Sleep disruptions                         | 1                   | 31                    | 4.68           | 0.038          |
| Fruit and vegetable intake                | 1                   | 31                    | 2.80           | 0.104          |
| Time:group                                | 4                   | 62                    | 0.61           | 0.654          |

**Table 12: Inferential statistics for Numeric Working Memory Reaction Time in the ITT population, outcome was log transformed**

| <b>Linear mixed effects model summary</b> |                     |                       |                |                |
|-------------------------------------------|---------------------|-----------------------|----------------|----------------|
|                                           | <b>Estimate</b>     | <b>t-value</b>        | <b>DF</b>      | <b>p-value</b> |
| Intercept (placebo, baseline)             | 6.359               | 72.89                 | 62             | <.001          |
| 1hr post dose                             | -0.023              | -0.74                 | 62             | 0.462          |
| 2.5hr post dose                           | -0.045              | -1.47                 | 62             | 0.146          |
| 150 mg group                              | 0.035               | 0.64                  | 28             | 0.526          |
| 300 mg group                              | -0.019              | -0.34                 | 28             | 0.735          |
| TICS chronic stress                       | 0.000               | -0.05                 | 28             | 0.961          |
| Sweets intake                             | -0.003              | -0.26                 | 28             | 0.794          |
| TICS social overload                      | -0.004              | -0.64                 | 28             | 0.530          |
| TICS pressure to succeed                  | 0.010               | 2.14                  | 28             | 0.041          |
| TICS social isolation                     | 0.005               | 0.74                  | 28             | 0.467          |
| 1hr post dose:150 mg                      | 0.010               | 0.22                  | 62             | 0.825          |
| 2.5hr post dose:150 mg                    | -0.009              | -0.21                 | 62             | 0.836          |
| 1hr post dose:300 mg                      | -0.032              | -0.74                 | 62             | 0.465          |
| 2.5hr post dose:300 mg                    | 0.001               | 0.01                  | 62             | 0.989          |
| <b>F-tests</b>                            |                     |                       |                |                |
|                                           | <b>Numerator DF</b> | <b>Denominator DF</b> | <b>F-value</b> | <b>p-value</b> |
| Intercept (placebo, baseline)             | 1                   | 62                    | 15889.41       | <.001          |
| Time                                      | 2                   | 62                    | 3.42           | 0.039          |
| Group                                     | 2                   | 28                    | 0.50           | 0.610          |
| TICS chronic stress                       | 1                   | 28                    | 4.26           | 0.048          |
| Sweets intake                             | 1                   | 28                    | 2.32           | 0.139          |
| TICS social overload                      | 1                   | 28                    | 0.29           | 0.594          |
| TICS pressure to succeed                  | 1                   | 28                    | 5.95           | 0.021          |
| TICS social isolation                     | 1                   | 28                    | 0.54           | 0.470          |
| Time:group                                | 4                   | 62                    | 0.45           | 0.776          |
| <b>Post-hoc Tukey tests for time</b>      |                     |                       |                |                |
|                                           | <b>Estimate</b>     | <b>z-value</b>        | <b>p-value</b> |                |
| 1hr post dose - baseline                  | -0.030              | -1.684                | 0.211          |                |
| 2.5hr post dose - baseline                | -0.048              | -2.690                | 0.020          |                |
| 2.5hr post dose - 1hr post dose           | -0.018              | -1.049                | 0.546          |                |

**Table 13: Inferential statistics for Spatial Working Memory Accuracy in the ITT population**

| <b>Linear mixed effects model summary</b> |                     |                       |                |                |
|-------------------------------------------|---------------------|-----------------------|----------------|----------------|
|                                           | <b>Estimate</b>     | <b>t-value</b>        | <b>DF</b>      | <b>p-value</b> |
| Intercept (placebo, baseline)             | 97.035              | 92.81                 | 58             | <.001          |
| 1hr post dose                             | -0.521              | -0.48                 | 58             | 0.634          |
| 2.5hr post dose                           | -1.062              | -0.95                 | 58             | 0.346          |
| 150 mg group                              | -0.001              | 0.00                  | 29             | 0.999          |
| 300 mg group                              | -0.044              | -0.03                 | 29             | 0.973          |
| Sleep disruption                          | -1.756              | -2.27                 | 29             | 0.031          |
| TICS lack of acceptance                   | 0.094               | 0.58                  | 29             | 0.564          |
| TICS social tension                       | 0.16                | 1.10                  | 29             | 0.280          |
| 1hr post dose:150 mg                      | -2.204              | -1.33                 | 58             | 0.187          |
| 2.5hr post dose:150 mg                    | 0.356               | 0.21                  | 58             | 0.835          |
| 1hr post dose:300 mg                      | -1.198              | -0.78                 | 58             | 0.439          |
| 2.5hr post dose:300 mg                    | 0.333               | 0.21                  | 58             | 0.832          |
| <b>F-tests</b>                            |                     |                       |                |                |
|                                           | <b>Numerator DF</b> | <b>Denominator DF</b> | <b>F-value</b> | <b>p-value</b> |
| Intercept (placebo, baseline)             | 1                   | 58                    | 74529.15       | <.001          |
| Time                                      | 2                   | 58                    | 2.85           | 0.066          |
| Group                                     | 2                   | 29                    | 0.29           | 0.749          |
| Sleep disruption                          | 1                   | 29                    | 5.53           | 0.026          |
| TICS lack of acceptance                   | 1                   | 29                    | 3.46           | 0.073          |
| TICS social tension                       | 1                   | 29                    | 1.28           | 0.267          |
| Time:group                                | 4                   | 58                    | 0.73           | 0.578          |

**Table 14: Inferential statistics for Spatial Working Memory Reaction Time in the ITT population, outcome was log transformed, one outlier was manually removed**

| <b>Linear mixed effects model summary</b> |                     |                       |                |                |
|-------------------------------------------|---------------------|-----------------------|----------------|----------------|
|                                           | <b>Estimate</b>     | <b>t-value</b>        | <b>DF</b>      | <b>p-value</b> |
| Intercept (placebo, baseline)             | 6.502               | 122.34                | 56             | <.001          |
| 1hr post dose                             | -0.069              | -1.90                 | 56             | 0.063          |
| 2.5hr post dose                           | -0.004              | -0.12                 | 56             | 0.903          |
| 150 mg group                              | -0.030              | -0.50                 | 31             | 0.618          |
| 300 mg group                              | -0.023              | -0.39                 | 31             | 0.697          |
| Sweets intake                             | -0.022              | -2.32                 | 31             | 0.027          |
| 1hr post dose:150 mg                      | 0.037               | 0.63                  | 56             | 0.529          |
| 2.5hr post dose:150 mg                    | -0.002              | -0.04                 | 56             | 0.970          |
| 1hr post dose:300 mg                      | 0.065               | 1.22                  | 56             | 0.228          |
| 2.5hr post dose:300 mg                    | -0.050              | -0.95                 | 56             | 0.345          |
| <b>F-tests</b>                            |                     |                       |                |                |
|                                           | <b>Numerator DF</b> | <b>Denominator DF</b> | <b>F-value</b> | <b>p-value</b> |
| Intercept (placebo, baseline)             | 1                   | 56                    | 98081.33       | <.001          |
| Time                                      | 2                   | 56                    | 1.30           | 0.281          |
| Group                                     | 2                   | 31                    | 0.07           | 0.935          |
| Sweets intake                             | 1                   | 31                    | 5.39           | 0.027          |
| Time:group                                | 4                   | 56                    | 1.26           | 0.297          |

**Table 15: Inferential statistics for Simple Reaction Time in the ITT population**

| <b>Linear mixed effects model summary</b> |                 |                |           |                |
|-------------------------------------------|-----------------|----------------|-----------|----------------|
|                                           | <b>Estimate</b> | <b>t-value</b> | <b>DF</b> | <b>p-value</b> |
| Intercept (placebo, baseline)             | 423.899         | 11.54          | 63        | <.001          |
| 1hr post dose                             | 2.037           | 0.33           | 63        | 0.743          |
| 2.5hr post dose                           | -3.927          | -0.62          | 63        | 0.540          |
| 150 mg group                              | -10.031         | -0.87          | 29        | 0.394          |
| 300 mg group                              | -17.293         | -1.51          | 29        | 0.143          |
| Sweets intake                             | -4.581          | -2.32          | 29        | 0.027          |
| Sleep disruptions                         | -12.448         | -1.31          | 29        | 0.201          |
| Sleep duration                            | -6.865          | -1.46          | 29        | 0.155          |
| 1hr post dose:150 mg                      | 6.765           | 0.76           | 63        | 0.452          |
| 2.5hr post dose:150 mg                    | 13.212          | 1.46           | 63        | 0.150          |
| 1hr post dose:300 mg                      | 5.783           | 0.66           | 63        | 0.510          |
| 2.5hr post dose:300 mg                    | 6.246           | 0.70           | 63        | 0.484          |

  

| <b>F-tests</b>                |                     |                       |                |                |
|-------------------------------|---------------------|-----------------------|----------------|----------------|
|                               | <b>Numerator DF</b> | <b>Denominator DF</b> | <b>F-value</b> | <b>p-value</b> |
| Intercept (placebo, baseline) | 1                   | 63                    | 6646.291       | <.001          |
| Time                          | 2                   | 63                    | 1.468          | 0.238          |
| Group                         | 2                   | 29                    | 1.266          | 0.297          |
| Sweets intake                 | 1                   | 29                    | 5.363          | 0.028          |
| Sleep disruptions             | 1                   | 29                    | 3.342          | 0.078          |
| Sleep duration                | 1                   | 29                    | 2.130          | 0.155          |
| Time:group                    | 4                   | 63                    | 0.573          | 0.683          |



**Table 16: Inferential statistics for Digit Vigilance Accuracy in the ITT population**

| <b>Linear mixed effects model summary</b> |                     |                       |                |                |
|-------------------------------------------|---------------------|-----------------------|----------------|----------------|
|                                           | <b>Estimate</b>     | <b>t-value</b>        | <b>DF</b>      | <b>p-value</b> |
| Intercept (placebo, baseline)             | 92.996              | 49.36                 | 60             | <.001          |
| 1hr post dose                             | -0.606              | -1.05                 | 60             | 0.299          |
| 2.5hr post dose                           | -0.986              | -1.73                 | 60             | 0.089          |
| 150 mg group                              | 0.069               | 0.1                   | 30             | 0.921          |
| 300 mg group                              | 0.759               | 1.11                  | 30             | 0.276          |
| Sweets intake                             | 0.283               | 2.91                  | 30             | 0.007          |
| Sleep duration                            | 0.596               | 2.63                  | 30             | 0.013          |
| 1hr post dose:150 mg                      | -0.605              | -0.74                 | 60             | 0.463          |
| 2.5hr post dose:150 mg                    | -0.203              | -0.25                 | 60             | 0.807          |
| 1hr post dose:300 mg                      | 0.606               | 0.76                  | 60             | 0.452          |
| 2.5hr post dose:300 mg                    | 0.185               | 0.23                  | 60             | 0.819          |
| <b>F-tests</b>                            |                     |                       |                |                |
|                                           | <b>Numerator DF</b> | <b>Denominator DF</b> | <b>F-value</b> | <b>p-value</b> |
| Intercept (placebo, baseline)             | 1                   | 60                    | 231103.2       | <.001          |
| Time                                      | 2                   | 60                    | 4.47           | 0.016          |
| Group                                     | 2                   | 30                    | 3.57           | 0.041          |
| Sweets intake                             | 1                   | 30                    | 7.50           | 0.010          |
| Sleep duration                            | 1                   | 30                    | 6.93           | 0.013          |
| Time:group                                | 4                   | 60                    | 0.60           | 0.667          |
| <b>Post-hoc Tukey tests for time</b>      |                     |                       |                |                |
|                                           | <b>Estimate</b>     | <b>z-value</b>        | <b>p-value</b> |                |
| 1hr post dose - baseline                  | -0.5879             | -1.794                | 0.172          |                |
| 2.5hr post dose - baseline                | -0.9773             | -2.935                | 0.009          |                |
| 2.5hr post dose - 1hr post dose           | -0.3893             | -1.169                | 0.472          |                |
| <b>Post-hoc Tukey tests for group</b>     |                     |                       |                |                |
|                                           | <b>Estimate</b>     | <b>z-value</b>        | <b>p-value</b> |                |
| 150 mg group - placebo                    | -0.08511            | -0.144                | 0.989          |                |
| 300 mg group - placebo                    | 1.12057             | 1.938                 | 0.128          |                |
| 300 mg group - 150 mg group               | 1.20569             | 2.051                 | 0.100          |                |

**Table 17: Inferential statistics for Digit Vigilance Reaction Time in the ITT population**

| <b>Linear mixed effects model summary</b> |                     |                       |                |                |
|-------------------------------------------|---------------------|-----------------------|----------------|----------------|
|                                           | <b>Estimate</b>     | <b>t-value</b>        | <b>DF</b>      | <b>p-value</b> |
| Intercept (placebo, baseline)             | 623.566             | 10.83                 | 66             | 0              |
| 1hr post dose                             | -2.22               | -0.28                 | 66             | 0.778          |
| 2.5hr post dose                           | 1.374               | 0.18                  | 66             | 0.861          |
| 150 mg group                              | 8.87                | 0.51                  | 31             | 0.613          |
| 300 mg group                              | 0.995               | 0.06                  | 31             | 0.955          |
| Sleep duration                            | -20.279             | -2.83                 | 31             | 0.008          |
| Sweets intake                             | -6.415              | -2.05                 | 31             | 0.049          |
| 1hr post dose:150 mg                      | 10.893              | 0.98                  | 66             | 0.329          |
| 2.5hr post dose:150 mg                    | 12.497              | 1.13                  | 66             | 0.264          |
| 1hr post dose:300 mg                      | 9.838               | 0.89                  | 66             | 0.378          |
| 2.5hr post dose:300 mg                    | -9.786              | -0.88                 | 66             | 0.38           |
| <b>F-tests</b>                            |                     |                       |                |                |
|                                           | <b>Numerator DF</b> | <b>Denominator DF</b> | <b>F-value</b> | <b>p-value</b> |
| Intercept (placebo, baseline)             | 1                   | 66                    | 4634.454       | <.001          |
| Time                                      | 2                   | 66                    | 0.537          | 0.587          |
| Group                                     | 2                   | 31                    | 0.711          | 0.499          |
| Sleep duration                            | 1                   | 31                    | 7.783          | 0.009          |
| Sweets intake                             | 1                   | 31                    | 4.189          | 0.049          |
| Time:group                                | 4                   | 66                    | 1.631          | 0.177          |

**Table 18: Inferential statistics for Digit Vigilance False Alarms in the ITT population, outcome was log transformed after adding 1 to each value**

| <b>Linear mixed effects model summary</b> |                     |                       |                |                |
|-------------------------------------------|---------------------|-----------------------|----------------|----------------|
|                                           | <b>Estimate</b>     | <b>t-value</b>        | <b>DF</b>      | <b>p-value</b> |
| Intercept (placebo, baseline)             | 0.407               | 1.30                  | 62             | 0.200          |
| 1hr post dose                             | -0.116              | -0.62                 | 62             | 0.536          |
| 2.5hr post dose                           | -0.058              | -0.31                 | 62             | 0.760          |
| 150 mg group                              | -0.243              | -1.12                 | 31             | 0.269          |
| 300 mg group                              | 0.147               | 0.69                  | 31             | 0.495          |
| <b>BFP</b>                                | 0.017               | 2.35                  | 31             | 0.025          |
| Sweets intake                             | -0.072              | -2.41                 | 31             | 0.022          |
| 1hr post dose:150 mg                      | 0.278               | 1.04                  | 62             | 0.303          |
| 2.5hr post dose:150 mg                    | 0.421               | 1.54                  | 62             | 0.129          |
| 1hr post dose:300 mg                      | -0.293              | -1.12                 | 62             | 0.268          |
| 2.5hr post dose:300 mg                    | -0.274              | -1.03                 | 62             | 0.307          |
| <b>F-tests</b>                            |                     |                       |                |                |
|                                           | <b>Numerator DF</b> | <b>Denominator DF</b> | <b>F-value</b> | <b>p-value</b> |
| Intercept (placebo, baseline)             | 1                   | 62                    | 106.254        | <.001          |
| Time                                      | 2                   | 62                    | 0.833          | 0.440          |
| Group                                     | 2                   | 31                    | 0.084          | 0.920          |
| <b>BFP</b>                                | 1                   | 31                    | 9.364          | 0.005          |
| Sweets intake                             | 1                   | 31                    | 5.978          | 0.020          |
| Time:group                                | 4                   | 62                    | 1.927          | 0.117          |

**Table 19: Inferential statistics for Choice Reaction Time Accuracy in the ITT population**

| <b>Linear mixed effects model summary</b> |                     |                       |                |                |
|-------------------------------------------|---------------------|-----------------------|----------------|----------------|
|                                           | <b>Estimate</b>     | <b>t-value</b>        | <b>DF</b>      | <b>p-value</b> |
| Intercept (placebo, baseline)             | 97.333              | 105.11                | 66             | <.001          |
| 1hr post dose                             | -1.500              | -2.03                 | 66             | 0.046          |
| 2.5hr post dose                           | -1.167              | -1.58                 | 66             | 0.119          |
| 150 mg group                              | -2.000              | -1.53                 | 33             | 0.136          |
| 300 mg group                              | -1.333              | -1.02                 | 33             | 0.316          |
| 1hr post dose:150 mg                      | 1.167               | 1.12                  | 66             | 0.268          |
| 2.5hr post dose:150 mg                    | 0.667               | 0.64                  | 66             | 0.526          |
| 1hr post dose:300 mg                      | 0.833               | 0.80                  | 66             | 0.428          |
| 2.5hr post dose:300 mg                    | 0.333               | 0.32                  | 66             | 0.751          |
| <b>F-tests</b>                            |                     |                       |                |                |
|                                           | <b>Numerator DF</b> | <b>Denominator DF</b> | <b>F-value</b> | <b>p-value</b> |
| Intercept (placebo, baseline)             | 1                   | 66                    | 40648.45       | <.001          |
| Time                                      | 2                   | 66                    | 2.54           | 0.086          |
| Group                                     | 2                   | 33                    | 0.74           | 0.483          |
| Time:group                                | 4                   | 66                    | 0.34           | 0.851          |

**Table 20: Inferential statistics for Choice Reaction Time in the ITT population**

| <b>Linear mixed effects model summary</b> |                     |                       |                |                |
|-------------------------------------------|---------------------|-----------------------|----------------|----------------|
|                                           | <b>Estimate</b>     | <b>t-value</b>        | <b>DF</b>      | <b>p-value</b> |
| Intercept (placebo, baseline)             | 371.24              | 14.85                 | 63             | <.001          |
| 1hr post dose                             | -4.593              | -0.77                 | 63             | 0.444          |
| 2.5hr post dose                           | -11.768             | -1.97                 | 63             | 0.053          |
| 150 mg group                              | 3.958               | 0.27                  | 28             | 0.792          |
| 300 mg group                              | 2.906               | 0.18                  | 28             | 0.859          |
| <b>BFP</b>                                | 1.003               | 1.31                  | 28             | 0.202          |
| Gender                                    | 12.094              | 0.84                  | 28             | 0.407          |
| TICS social overload                      | 1.848               | 1.05                  | 28             | 0.302          |
| TICS chronic worrying                     | 1.044               | 0.53                  | 28             | 0.601          |
| 1hr post dose:150 mg                      | 11.864              | 1.41                  | 63             | 0.162          |
| 2.5hr post dose:150 mg                    | 14.188              | 1.72                  | 63             | 0.091          |
| 1hr post dose:300 mg                      | -0.156              | -0.02                 | 63             | 0.985          |
| 2.5hr post dose:300 mg                    | -0.133              | -0.02                 | 63             | 0.987          |
| <b>F-tests</b>                            |                     |                       |                |                |
|                                           | <b>Numerator DF</b> | <b>Denominator DF</b> | <b>F-value</b> | <b>p-value</b> |
| Intercept (placebo, baseline)             | 1                   | 63                    | 6179.861       | <.001          |
| Time                                      | 2                   | 63                    | 2.575          | 0.084          |
| Group                                     | 2                   | 28                    | 0.970          | 0.391          |
| <b>BFP</b>                                | 1                   | 28                    | 6.748          | 0.015          |
| Gender                                    | 1                   | 28                    | 0.947          | 0.339          |
| TICS social overload                      | 1                   | 28                    | 2.543          | 0.122          |
| TICS chronic worrying                     | 1                   | 28                    | 0.270          | 0.607          |
| Time:group                                | 4                   | 63                    | 1.171          | 0.332          |

### 4.3 Physiological outcomes

**Table 21: Inferential statistics for HR in the ITT population, outcome was log transformed**

| <b>Linear mixed effects model summary</b> |                     |                       |                |                |
|-------------------------------------------|---------------------|-----------------------|----------------|----------------|
|                                           | <b>Estimate</b>     | <b>t-value</b>        | <b>DF</b>      | <b>p-value</b> |
| Intercept (placebo, baseline)             | 4.007               | 43.17                 | 177            | <.001          |
| Time                                      | 0.000               | -0.62                 | 177            | 0.535          |
| 150 mg group                              | -0.080              | -1.37                 | 32             | 0.181          |
| 300 mg group                              | 0.007               | 0.13                  | 32             | 0.900          |
| Gender                                    | 0.129               | 2.59                  | 32             | 0.014          |
| Time:150 mg                               | 0.001               | 2.65                  | 177            | 0.009          |
| Time:300 mg                               | 0.000               | 0.87                  | 177            | 0.386          |
| <b>F-tests</b>                            |                     |                       |                |                |
|                                           | <b>Numerator DF</b> | <b>Denominator DF</b> | <b>F-value</b> | <b>p-value</b> |
| Intercept (placebo, baseline)             | 1                   | 177                   | 32709.81       | <.001          |
| Time                                      | 1                   | 177                   | 3.23           | 0.074          |
| Group                                     | 2                   | 32                    | 0.32           | 0.727          |
| Gender                                    | 1                   | 32                    | 6.72           | 0.014          |
| Time:group                                | 2                   | 177                   | 3.65           | 0.028          |

**Table 22: Inferential statistics for diastolic BP in the ITT population**

| <b>Linear mixed effects model summary</b> |                     |                       |                |                |
|-------------------------------------------|---------------------|-----------------------|----------------|----------------|
|                                           | <b>Estimate</b>     | <b>t-value</b>        | <b>DF</b>      | <b>p-value</b> |
| Intercept (placebo, baseline)             | 58.222              | 10.71                 | 177            | <.001          |
| Time                                      | -0.006              | -0.86                 | 177            | 0.392          |
| 150 mg group                              | 1.173               | 0.42                  | 31             | 0.678          |
| 300 mg group                              | 0.587               | 0.21                  | 31             | 0.834          |
| <b>BFP</b>                                | 0.22                | 1.59                  | 31             | 0.122          |
| Weight                                    | 0.114               | 1.56                  | 31             | 0.13           |
| Time:150 mg                               | 0.009               | 0.86                  | 177            | 0.393          |
| Time:300 mg                               | 0.008               | 0.77                  | 177            | 0.442          |
| <b>F-tests</b>                            |                     |                       |                |                |
|                                           | <b>Numerator DF</b> | <b>Denominator DF</b> | <b>F-value</b> | <b>p-value</b> |
| Intercept (placebo, baseline)             | 1                   | 177                   | 4552.855       | <.001          |
| Time                                      | 1                   | 177                   | 0.025          | 0.876          |
| Group                                     | 2                   | 31                    | 0.311          | 0.735          |
| <b>BFP</b>                                | 1                   | 31                    | 6.736          | 0.014          |
| Weight                                    | 1                   | 31                    | 2.424          | 0.130          |
| Time:group                                | 2                   | 177                   | 0.445          | 0.642          |

**Table 23: Inferential statistics for systolic BP in the ITT population**

| <b>Linear mixed effects model summary</b> |                 |                |           |                |
|-------------------------------------------|-----------------|----------------|-----------|----------------|
|                                           | <b>Estimate</b> | <b>t-value</b> | <b>DF</b> | <b>p-value</b> |
| Intercept (placebo, baseline)             | 101.74          | 3.21           | 176       | 0.002          |
| Time                                      | 0.013           | 1.38           | 176       | 0.17           |
| 150 mg group                              | -2.411          | -0.62          | 30        | 0.539          |
| 300 mg group                              | 0.044           | 0.01           | 30        | 0.991          |
| Gender                                    | -6.938          | -1.24          | 30        | 0.224          |
| WHR                                       | 37.601          | 1.19           | 30        | 0.243          |
| Fruit and vegetable intake                | -1.04           | -1.03          | 30        | 0.313          |
| Time:150 mg                               | 0.02            | 1.53           | 176       | 0.128          |
| Time:300 mg                               | 0.01            | 0.60           | 176       | 0.551          |

  

| <b>F-tests</b>                |                     |                       |                |                |
|-------------------------------|---------------------|-----------------------|----------------|----------------|
|                               | <b>Numerator DF</b> | <b>Denominator DF</b> | <b>F-value</b> | <b>p-value</b> |
| Intercept (placebo, baseline) | 1                   | 176                   | 5743.48        | <.001          |
| Time                          | 1                   | 176                   | 16.83          | <.001          |
| Group                         | 2                   | 30                    | 0.09           | 0.913          |
| Gender                        | 1                   | 30                    | 18.14          | <.001          |
| WHR                           | 1                   | 30                    | 1.22           | 0.278          |
| Fruit and vegetable intake    | 1                   | 30                    | 0.93           | 0.344          |
| Time:group                    | 2                   | 176                   | 1.19           | 0.308          |

  

| <b>Linear mixed effects model summary without interaction</b> |                 |                |           |                |
|---------------------------------------------------------------|-----------------|----------------|-----------|----------------|
|                                                               | <b>Estimate</b> | <b>t-value</b> | <b>DF</b> | <b>p-value</b> |
| Intercept (placebo, baseline)                                 | 101.165         | 3.19           | 178       | 0.002          |
| Time                                                          | 0.022           | 4.10           | 178       | <.001          |
| 150 mg group                                                  | -1.040          | -0.28          | 30        | 0.785          |
| 300 mg group                                                  | 0.571           | 0.15           | 30        | 0.880          |
| Gender                                                        | -6.959          | -1.24          | 30        | 0.223          |
| WHR                                                           | 37.575          | 1.19           | 30        | 0.244          |
| Fruit and vegetable intake                                    | -1.038          | -1.02          | 30        | 0.314          |



**Table 24: Inferential statistics for salivary cortisol in the ITT population, outcome was log transformed**

| <b>Linear mixed effects model summary</b> |                     |                       |                |                |
|-------------------------------------------|---------------------|-----------------------|----------------|----------------|
|                                           | <b>Estimate</b>     | <b>t-value</b>        | <b>DF</b>      | <b>p-value</b> |
| Intercept (placebo, baseline)             | 1.509               | 3.54                  | 171            | <.001          |
| Time                                      | -0.001              | -2.54                 | 171            | 0.012          |
| 150 mg group                              | -0.268              | -1.97                 | 29             | 0.059          |
| 300 mg group                              | -0.249              | -1.79                 | 29             | 0.085          |
| Weight                                    | -0.003              | -0.79                 | 29             | 0.433          |
| Sleep quality                             | -0.049              | -1.27                 | 29             | 0.215          |
| Sweets intake                             | 0.026               | 0.95                  | 29             | 0.348          |
| Level of activity                         | 0.073               | 2.62                  | 29             | 0.014          |
| Time:150 mg                               | 0.001               | 0.66                  | 171            | 0.512          |
| Time:300 mg                               | 0.001               | 1.51                  | 171            | 0.133          |
| <b>F-tests</b>                            |                     |                       |                |                |
|                                           | <b>Numerator DF</b> | <b>Denominator DF</b> | <b>F-value</b> | <b>p-value</b> |
| Intercept (placebo, baseline)             | 1                   | 171                   | 478.73         | <.001          |
| Time                                      | 1                   | 171                   | 6.81           | 0.010          |
| Group                                     | 2                   | 29                    | 1.82           | 0.180          |
| weight                                    | 1                   | 29                    | 3.71           | 0.064          |
| Sleep quality                             | 1                   | 29                    | 2.06           | 0.162          |
| Sweets intake                             | 1                   | 29                    | 2.00           | 0.168          |
| Level of activity                         | 1                   | 29                    | 6.38           | 0.017          |
| Time:group                                | 2                   | 171                   | 1.14           | 0.321          |

**Table 25: Inferential statistics for salivary oxytocin in the ITT population**

| <b>Linear mixed effects model summary</b> |                         |                           |                |                |
|-------------------------------------------|-------------------------|---------------------------|----------------|----------------|
|                                           | <b>Estimate</b>         | <b>t-value</b>            | <b>DF</b>      | <b>p-value</b> |
| Intercept (placebo, before treatment)     | 1.429                   | 9.99                      | 31             | <.001          |
| Time (after treatment)                    | -0.105                  | -1.11                     | 31             | 0.278          |
| 150 mg group                              | 0.496                   | 2.96                      | 31             | 0.006          |
| 300 mg group                              | 0.189                   | 1.11                      | 31             | 0.275          |
| CAR increase                              | -0.010                  | -1.11                     | 31             | 0.274          |
| Time:150 mg                               | -0.097                  | -0.71                     | 31             | 0.483          |
| Time:300 mg                               | 0.200                   | 1.45                      | 31             | 0.156          |
| <b>F-tests</b>                            |                         |                           |                |                |
|                                           | <b>Numerator<br/>DF</b> | <b>Denominator<br/>DF</b> | <b>F-value</b> | <b>p-value</b> |
| Intercept (placebo, baseline)             | 1                       | 31                        | 643.08         | <.001          |
| Time                                      | 1                       | 31                        | 1.52           | 0.226          |
| Group                                     | 2                       | 31                        | 5.59           | 0.009          |
| CAR increase                              | 1                       | 31                        | 1.17           | 0.287          |
| Time:group                                | 2                       | 31                        | 2.34           | 0.113          |
| <b>Post-hoc Tukey tests for group</b>     |                         |                           |                |                |
|                                           | <b>Estimate</b>         | <b>z-value</b>            | <b>p-value</b> |                |
| 150 mg group - placebo group              | 0.444                   | 2.920                     | 0.010          |                |
| 300 mg group - placebo group              | 0.290                   | 1.858                     | 0.151          |                |
| 300 mg group - 150 mg group               | -0.154                  | -1.016                    | 0.567          |                |

#### 4.4 Exploratory cognitive outcomes

**Table 26: Inferential statistics for cognitive factor: secondary memory in the ITT population**

| <b>Linear mixed effects model summary</b> |                     |                       |                |                |
|-------------------------------------------|---------------------|-----------------------|----------------|----------------|
|                                           | <b>Estimate</b>     | <b>t-value</b>        | <b>DF</b>      | <b>p-value</b> |
| Intercept (placebo, baseline)             | 324.695             | 12.51                 | 66             | <.001          |
| 1hr post dose                             | -33.808             | -3.58                 | 66             | 0.001          |
| 2.5hr post dose                           | -26.38              | -2.79                 | 66             | 0.007          |
| 150 mg group                              | -20.387             | -1.31                 | 32             | 0.199          |
| 300 mg group                              | -9.481              | -0.61                 | 32             | 0.546          |
| Weight                                    | -0.598              | -1.83                 | 32             | 0.076          |
| 1hr post dose:150 mg                      | 22.538              | 1.69                  | 66             | 0.096          |
| 2.5hr post dose:150 mg                    | 0.627               | 0.05                  | 66             | 0.963          |
| 1hr post dose:300 mg                      | 17.419              | 1.3                   | 66             | 0.197          |
| 2.5hr post dose:300 mg                    | 19.99               | 1.5                   | 66             | 0.139          |
| <b>F-tests</b>                            |                     |                       |                |                |
|                                           | <b>Numerator DF</b> | <b>Denominator DF</b> | <b>F-value</b> | <b>p-value</b> |
| Intercept (placebo, baseline)             | 1                   | 66                    | 2211.45        | <.001          |
| Time                                      | 2                   | 66                    | 8.97           | <.001          |
| Group                                     | 2                   | 32                    | 0.66           | 0.523          |
| Weight                                    | 1                   | 32                    | 3.36           | 0.076          |
| Time:group                                | 4                   | 66                    | 1.68           | 0.165          |
| <b>Post-hoc Tukey tests for time</b>      |                     |                       |                |                |
|                                           | <b>Estimate</b>     | <b>z-value</b>        | <b>p-value</b> |                |
| 1hr post dose - baseline                  | 20.49               | -3.685                | <.001          |                |
| 2.5hr post dose - baseline                | 19.51               | -3.508                | 0.001          |                |
| 2.5hr post dose - 1hr post dose           | 0.98                | 0.176                 | 0.983          |                |

**Table 27: Inferential statistics for cognitive factor: Working Memory in the ITT population**

| <b>Linear mixed effects model summary</b> |                     |                       |                |                |
|-------------------------------------------|---------------------|-----------------------|----------------|----------------|
|                                           | <b>Estimate</b>     | <b>t-value</b>        | <b>DF</b>      | <b>p-value</b> |
| Intercept (placebo, baseline)             | 197.619             | 78.36                 | 59             | <.001          |
| 1hr post dose                             | -0.243              | -0.14                 | 59             | 0.889          |
| 2.5hr post dose                           | -1.554              | -0.87                 | 59             | 0.390          |
| 150 mg group                              | -2.910              | -1.14                 | 31             | 0.263          |
| 300 mg group                              | 2.215               | 0.90                  | 31             | 0.376          |
| Sleep disruption                          | -3.579              | -1.90                 | 31             | 0.067          |
| TICS work dissatisfaction                 | -0.346              | -1.89                 | 31             | 0.069          |
| 1hr post dose:150 mg                      | -0.530              | -0.20                 | 59             | 0.841          |
| 2.5hr post dose:150 mg                    | 2.271               | 0.85                  | 59             | 0.398          |
| 1hr post dose:300 mg                      | 0.191               | 0.08                  | 59             | 0.939          |
| 2.5hr post dose:300 mg                    | 1.381               | 0.55                  | 59             | 0.583          |
| <b>F-tests</b>                            |                     |                       |                |                |
|                                           | <b>Numerator DF</b> | <b>Denominator DF</b> | <b>F-value</b> | <b>p-value</b> |
| Intercept (placebo, baseline)             | 1                   | 59                    | 54527.41       | <.001          |
| Time                                      | 2                   | 59                    | 0.06           | 0.939          |
| Group                                     | 2                   | 31                    | 2.34           | 0.113          |
| Sleep disruption                          | 1                   | 31                    | 6.29           | 0.018          |
| TICS work dissatisfaction                 | 1                   | 31                    | 3.47           | 0.072          |
| Time:group                                | 4                   | 59                    | 0.32           | 0.864          |

**Table 28: Inferential statistics for cognitive factor: Speed of Memory in the ITT population**

| <b>Linear mixed effects model summary</b> |                     |                       |                |                |
|-------------------------------------------|---------------------|-----------------------|----------------|----------------|
|                                           | <b>Estimate</b>     | <b>t-value</b>        | <b>DF</b>      | <b>p-value</b> |
| Intercept (placebo, baseline)             | 3115.71             | 23.5                  | 66             | <.000          |
| 1hr post dose                             | -111.264            | -1.54                 | 66             | 0.129          |
| 2.5hr post dose                           | -100.341            | -1.39                 | 66             | 0.17           |
| 150 mg group                              | 295.174             | 2.03                  | 31             | 0.051          |
| 300 mg group                              | 8.126               | 0.05                  | 31             | 0.957          |
| Sleep disruption                          | -324.892            | -2.72                 | 31             | 0.011          |
| TICS: social isolation                    | 42.317              | 3.48                  | 31             | 0.002          |
| 1hr post dose:150 mg                      | -57.637             | -0.56                 | 66             | 0.575          |
| 2.5hr post dose:150 mg                    | -159.307            | -1.56                 | 66             | 0.124          |
| 1hr post dose:300 mg                      | 58.047              | 0.57                  | 66             | 0.572          |
| 2.5hr post dose:300 mg                    | 14.038              | 0.14                  | 66             | 0.891          |
| <b>F-tests</b>                            |                     |                       |                |                |
|                                           | <b>Numerator DF</b> | <b>Denominator DF</b> | <b>F-value</b> | <b>p-value</b> |
| Intercept (placebo, baseline)             | 1                   | 66                    | 3446.38        | <.000          |
| Time                                      | 2                   | 66                    | 6.86           | 0.002          |
| Group                                     | 2                   | 31                    | 0.69           | 0.510          |
| Sleep disruption                          | 1                   | 31                    | 5.01           | 0.033          |
| TICS: social isolation                    | 1                   | 31                    | 12.12          | 0.002          |
| Time:group                                | 4                   | 66                    | 0.97           | 0.431          |
| <b>Post-hoc Tukey tests for time</b>      |                     |                       |                |                |
|                                           | <b>Estimate</b>     | <b>z-value</b>        | <b>p-value</b> |                |
| 1hr post dose - baseline                  | -111.13             | -2.663                | 0.021          |                |
| 2.5hr post dose - baseline                | -148.76             | -3.564                | 0.001          |                |
| 2.5hr post dose - 1hr post dose           | -37.64              | -0.902                | 0.639          |                |

**Table 29: Inferential statistics for cognitive factor: Accuracy of Attention in the ITT population**

| <b>Linear mixed effects model summary</b> |                     |                       |                |                |
|-------------------------------------------|---------------------|-----------------------|----------------|----------------|
|                                           | <b>Estimate</b>     | <b>t-value</b>        | <b>DF</b>      | <b>p-value</b> |
| Intercept (placebo, baseline)             | 96.556              | 130.12                | 59             | <.001          |
| 1hr post dose                             | -0.845              | -1.65                 | 59             | 0.105          |
| 2.5hr post dose                           | -0.768              | -1.54                 | 59             | 0.128          |
| 150 mg group                              | 0.122               | 0.15                  | 31             | 0.886          |
| 300 mg group                              | 0.266               | 0.33                  | 31             | 0.745          |
| Sweets intake                             | 0.305               | 2.26                  | 31             | 0.031          |
| 1hr post dose:150 mg                      | -0.516              | -0.68                 | 59             | 0.499          |
| 2.5hr post dose:150 mg                    | -1.080              | -1.44                 | 59             | 0.154          |
| 1hr post dose:300 mg                      | 0.473               | 0.65                  | 59             | 0.518          |
| 2.5hr post dose:300 mg                    | 0.055               | 0.08                  | 59             | 0.940          |
| <b>F-tests</b>                            |                     |                       |                |                |
|                                           | <b>Numerator DF</b> | <b>Denominator DF</b> | <b>F-value</b> | <b>p-value</b> |
| Intercept (placebo, baseline)             | 1                   | 59                    | 115790.5       | <.001          |
| Time                                      | 2                   | 59                    | 6.75           | 0.002          |
| Group                                     | 2                   | 31                    | 0.54           | 0.588          |
| Sweets intake                             | 1                   | 31                    | 5.15           | 0.030          |
| Time:group                                | 4                   | 59                    | 0.83           | 0.509          |
| <b>Post-hoc Tukey tests for time</b>      |                     |                       |                |                |
|                                           | <b>Estimate</b>     | <b>z-value</b>        | <b>p-value</b> |                |
| 1hr post dose - baseline                  | -0.816              | -2.695                | 0.019          |                |
| 2.5hr post dose - baseline                | -1.067              | -3.528                | 0.001          |                |
| 2.5hr post dose - 1hr post dose           | -0.252              | -0.850                | 0.672          |                |

**Table 30: Inferential statistics for cognitive factor: Speed of Attention in the ITT population**

| <b>Linear mixed effects model summary</b> |                     |                       |                |                |
|-------------------------------------------|---------------------|-----------------------|----------------|----------------|
|                                           | <b>Estimate</b>     | <b>t-value</b>        | <b>DF</b>      | <b>p-value</b> |
| Intercept (placebo, baseline)             | 1543.576            | 12.51                 | 64             | <.001          |
| 1hr post dose                             | -6.297              | -0.51                 | 64             | 0.613          |
| 2.5hr post dose                           | -3.099              | -0.25                 | 64             | 0.803          |
| 150 mg group                              | -8.215              | -0.23                 | 29             | 0.823          |
| 300 mg group                              | -7.004              | -0.19                 | 29             | 0.848          |
| Sweets intake                             | -13.589             | -2.05                 | 29             | 0.050          |
| Sleep disruption                          | -58.679             | -1.83                 | 29             | 0.077          |
| Sleep duration                            | -28.798             | -1.82                 | 29             | 0.079          |
| 1hr post dose:150 mg                      | 29.674              | 1.66                  | 64             | 0.103          |
| 2.5hr post dose:150 mg                    | 31.48               | 1.76                  | 64             | 0.084          |
| 1hr post dose:300 mg                      | 16.986              | 0.97                  | 64             | 0.336          |
| 2.5hr post dose:300 mg                    | -14.895             | -0.85                 | 64             | 0.399          |
| <b>F-tests</b>                            |                     |                       |                |                |
|                                           | <b>Numerator DF</b> | <b>Denominator DF</b> | <b>F-value</b> | <b>p-value</b> |
| Intercept (placebo, baseline)             | 1                   | 64                    | 7688.12        | <.001          |
| Time                                      | 2                   | 64                    | 0.84           | 0.437          |
| Group                                     | 2                   | 29                    | 0.23           | 0.798          |
| Sweets intake                             | 1                   | 29                    | 4.16           | 0.051          |
| Sleep disruption                          | 1                   | 29                    | 6.13           | 0.019          |
| Sleep duration                            | 1                   | 29                    | 3.30           | 0.080          |
| Time:group                                | 4                   | 64                    | 2.38           | 0.061          |

**Table 31: Inferential statistics for Immediate Word Recall Accuracy for combined treatment group in the ITT population**

| <b>Linear mixed effects model summary</b> |                     |                       |                |                |
|-------------------------------------------|---------------------|-----------------------|----------------|----------------|
|                                           | <b>Estimate</b>     | <b>t-value</b>        | <b>DF</b>      | <b>p-value</b> |
| Intercept (placebo, baseline)             | 71.446              | 5.44                  | 68             | <.001          |
| 1hr post dose                             | -15.357             | -4.17                 | 68             | <.001          |
| 2.5hr post dose                           | -6.189              | -1.68                 | 68             | 0.097          |
| sage group(collapsed)                     | -5.303              | -1.14                 | 31             | 0.264          |
| Weight                                    | -0.171              | -1.5                  | 31             | 0.145          |
| Gender                                    | 5.571               | 1.35                  | 31             | 0.188          |
| TICS social overload                      | -0.911              | -2.03                 | 31             | 0.051          |
| 1hr post dose:sage group(collapsed)       | 12.658              | 2.81                  | 68             | 0.007          |
| 2.5hr post dose:sage group(collapsed)     | 3.887               | 0.86                  | 68             | 0.392          |
| <b>F-tests</b>                            |                     |                       |                |                |
|                                           | <b>Numerator DF</b> | <b>Denominator DF</b> | <b>F-value</b> | <b>p-value</b> |
| Intercept (placebo, baseline)             | 1                   | 68                    | 958.98         | <.001          |
| Time                                      | 2                   | 68                    | 5.30           | 0.007          |
| group                                     | 1                   | 31                    | 0.14           | 0.714          |
| Weight                                    | 1                   | 31                    | 4.83           | 0.036          |
| Gender                                    | 1                   | 31                    | 1.04           | 0.315          |
| TICS social overload                      | 1                   | 31                    | 4.14           | 0.051          |
| Time:group                                | 2                   | 68                    | 4.14           | 0.020          |

**Table 32: Inferential statistics for HR for combined treatment group in the ITT population, outcome was log transformed**

| <b>Linear mixed effects model summary</b> |                     |                       |                |                |
|-------------------------------------------|---------------------|-----------------------|----------------|----------------|
|                                           | <b>Estimate</b>     | <b>t-value</b>        | <b>DF</b>      | <b>p-value</b> |
| Intercept (placebo, baseline)             | 4.021               | 43.51                 | 178            | <.001          |
| Time                                      | 0.000               | -0.62                 | 178            | 0.538          |
| sage group(collapsed)                     | -0.036              | -0.71                 | 33             | 0.480          |
| Gender                                    | 0.121               | 2.45                  | 33             | 0.020          |
| Time:sage group(collapsed)                | 0.000               | 2.02                  | 178            | 0.045          |
| <b>F-tests</b>                            |                     |                       |                |                |
|                                           | <b>Numerator DF</b> | <b>Denominator DF</b> | <b>F-value</b> | <b>p-value</b> |
| Intercept (placebo, baseline)             | 1                   | 178                   | 32460.32       | <.001          |
| Time                                      | 1                   | 178                   | 3.19           | 0.076          |
| Group                                     | 1                   | 33                    | 0.08           | 0.785          |
| Gender                                    | 1                   | 33                    | 5.99           | 0.020          |
| Time:group                                | 1                   | 178                   | 4.08           | 0.045          |



**Table 33: Inferential statistics for VAS stress for combined treatment group in the ITT population, outcome was square root transformed**

| <b>Linear mixed effects model summary</b> |                     |                       |                |                |
|-------------------------------------------|---------------------|-----------------------|----------------|----------------|
|                                           | <b>Estimate</b>     | <b>t-value</b>        | <b>DF</b>      | <b>p-value</b> |
| Intercept (placebo, baseline)             | 5.26                | 2.99                  | 171            | 0.003          |
| Time                                      | -0.009              | -5.34                 | 171            | <.001          |
| sage group(collapsed)                     | -0.863              | -1.42                 | 32             | 0.165          |
| recovery                                  | -0.315              | -1.56                 | 32             | 0.129          |
| Sweets intake                             | 0.164               | 1.21                  | 32             | 0.236          |
| Time:sage group(collapsed)                | 0.006               | 2.68                  | 171            | 0.008          |
| <b>F-tests</b>                            |                     |                       |                |                |
|                                           | <b>Numerator DF</b> | <b>Denominator DF</b> | <b>F-value</b> | <b>p-value</b> |
| Intercept (placebo, baseline)             | 1                   | 171                   | 93.12          | <.001          |
| Time                                      | 1                   | 171                   | 28.90          | <.001          |
| Group                                     | 1                   | 32                    | 0.45           | 0.507          |
| Gender                                    | 1                   | 32                    | 4.10           | 0.051          |
| Fruit and vegetable intake                | 1                   | 32                    | 1.46           | 0.235          |
| Time:group                                | 1                   | 171                   | 7.18           | 0.008          |

**Table 34: Inferential statistics for SAM dominance for combined treatment group in the ITT population, outcome was square transformed**

| <b>Linear mixed effects model summary</b> |                     |                       |                |                |
|-------------------------------------------|---------------------|-----------------------|----------------|----------------|
|                                           | <b>Estimate</b>     | <b>t-value</b>        | <b>DF</b>      | <b>p-value</b> |
| Intercept (placebo, baseline)             | 75.097              | 10.47                 | 170            | <.001          |
| Time                                      | 0.041               | 3.47                  | 170            | 0.001          |
| sage group(collapsed)                     | -3.957              | -0.72                 | 31             | 0.479          |
| Sleep disruptions                         | -5.033              | -0.87                 | 31             | 0.390          |
| TICS work dissatisfaction                 | -1.507              | -2.68                 | 31             | 0.012          |
| Time:sage group(collapsed)                | -0.020              | -1.34                 | 170            | 0.181          |
| <b>F-tests</b>                            |                     |                       |                |                |
|                                           | <b>Numerator DF</b> | <b>Denominator DF</b> | <b>F-value</b> | <b>p-value</b> |
| Intercept (placebo, baseline)             | 1                   | 170                   | 478.54         | <.001          |
| Time                                      | 1                   | 170                   | 16.61          | <.001          |
| Group                                     | 1                   | 31                    | 1.46           | 0.236          |
| Sleep disruptions                         | 1                   | 31                    | 2.81           | 0.104          |
| TICS work dissatisfaction                 | 1                   | 31                    | 7.20           | 0.012          |
| Time:group                                | 1                   | 170                   | 1.81           | 0.181          |

**Table 35: Inferential statistics for SAM mood for combined treatment group in the ITT population, outcome was log transformed**

| <b>Linear mixed effects model summary</b> |                     |                       |                |                |
|-------------------------------------------|---------------------|-----------------------|----------------|----------------|
|                                           | <b>Estimate</b>     | <b>t-value</b>        | <b>DF</b>      | <b>p-value</b> |
| Intercept (placebo, baseline)             | 0.837               | 1.96                  | 176            | 0.052          |
| Time                                      | -0.006              | -2.3                  | 29             | 0.029          |
| sage group(collapsed)                     | 0.098               | 1.91                  | 29             | 0.066          |
| Weight                                    | 0.205               | 1.98                  | 29             | 0.057          |
| Sleep duration                            | -0.047              | -1.43                 | 29             | 0.162          |
| Sleep disruption                          | 0.023               | 1.91                  | 29             | 0.066          |
| recovery                                  | -0.001              | -2.41                 | 176            | 0.017          |
| TICS chronic worrying                     | -0.088              | -0.88                 | 29             | 0.386          |
| Time: sage group(collapsed)               | 0.001               | 1.44                  | 176            | 0.151          |
| <b>F-tests</b>                            |                     |                       |                |                |
|                                           | <b>Numerator DF</b> | <b>Denominator DF</b> | <b>F-value</b> | <b>p-value</b> |
| Intercept (placebo, baseline)             | 1                   | 176                   | 587.91         | <.001          |
| Time                                      | 1                   | 29                    | 4.91           | 0.035          |
| Group                                     | 1                   | 29                    | 9.24           | 0.005          |
| Weight                                    | 1                   | 29                    | 5.08           | 0.032          |
| Sleep duration                            | 1                   | 29                    | 2.95           | 0.097          |
| Sleep disruption                          | 1                   | 29                    | 3.43           | 0.074          |
| recovery                                  | 1                   | 176                   | 4.59           | 0.034          |
| TICS chronic worrying                     | 1                   | 29                    | 0.24           | 0.628          |
| Time:group                                | 1                   | 176                   | 2.08           | 0.151          |

**Table 36: Inferential statistics for Picture Recognition Original Stimuli Accuracy in the ITT population, outcome was square transformed**

| <b>Linear mixed effects model summary</b> |                     |                       |                |                |
|-------------------------------------------|---------------------|-----------------------|----------------|----------------|
|                                           | <b>Estimate</b>     | <b>t-value</b>        | <b>DF</b>      | <b>p-value</b> |
| Intercept (placebo, baseline)             | 6277.332            | 7.47                  | 65             | <.001          |
| 1hr post dose                             | -29.167             | -0.06                 | 65             | 0.952          |
| 2.5hr post dose                           | 664.583             | 1.39                  | 65             | 0.170          |
| 150 mg                                    | 62.757              | 0.10                  | 30             | 0.918          |
| 300 mg                                    | -96.489             | -0.15                 | 30             | 0.879          |
| Gender                                    | 820.047             | 2.02                  | 30             | 0.052          |
| TICS social overload                      | 204.861             | 3.80                  | 30             | 0.001          |
| TICS work dissatisfaction                 | -182.257            | -4.08                 | 30             | <.001          |
| 1hr post dose:150 mg                      | -322.917            | -0.48                 | 65             | 0.635          |
| 2.5hr post dose:150 mg                    | -437.500            | -0.65                 | 65             | 0.521          |
| 1hr post dose:300 mg                      | 511.529             | 0.74                  | 65             | 0.460          |
| 2.5hr post dose:300 mg                    | -105.137            | -0.15                 | 65             | 0.879          |
| <b>F-tests</b>                            |                     |                       |                |                |
|                                           | <b>Numerator DF</b> | <b>Denominator DF</b> | <b>F-value</b> | <b>p-value</b> |
| Intercept (placebo, baseline)             | 1                   | 65                    | 1639.5596      | <.001          |
| Time                                      | 2                   | 65                    | 1.7595         | 0.180          |
| Group                                     | 2                   | 30                    | 0.2984         | 0.744          |
| Gender                                    | 1                   | 30                    | 4.9012         | 0.035          |
| TICS social overload                      | 1                   | 30                    | 4.9184         | 0.034          |
| TICS work dissatisfaction                 | 1                   | 30                    | 16.4233        | <.001          |
| Time:group                                | 4                   | 65                    | 0.4817         | 0.749          |

**Table 37: Inferential statistics for Picture Recognition New Stimuli Accuracy in the ITT population**

| <b>Linear mixed effects model summary</b> |                     |                       |                |                |
|-------------------------------------------|---------------------|-----------------------|----------------|----------------|
|                                           | <b>Estimate</b>     | <b>t-value</b>        | <b>DF</b>      | <b>p-value</b> |
| Intercept (placebo, baseline)             | 72.90881            | 17.49                 | 66             | <.001          |
| 1hr post dose                             | 0.83333             | 0.27                  | 66             | 0.787          |
| 2.5hr post dose                           | 1.66667             | 0.54                  | 66             | 0.589          |
| 150 mg                                    | 3.67950             | 0.85                  | 31             | 0.400          |
| 300 mg                                    | 3.38297             | 0.76                  | 31             | 0.453          |
| CAR increase                              | 0.37517             | 1.85                  | 31             | 0.075          |
| TICS social overload                      | 0.76488             | 2.16                  | 31             | 0.039          |
| 1hr post dose:150 mg                      | -2.91667            | -0.67                 | 66             | 0.504          |
| 2.5hr post dose:150 mg                    | -9.58333            | -2.21                 | 66             | 0.031          |
| 1hr post dose:300 mg                      | -2.08333            | -0.48                 | 66             | 0.633          |
| 2.5hr post dose:300 mg                    | -1.66667            | -0.38                 | 66             | 0.702          |
| <b>F-tests</b>                            |                     |                       |                |                |
|                                           | <b>Numerator DF</b> | <b>Denominator DF</b> | <b>F-value</b> | <b>p-value</b> |
| Intercept (placebo, baseline)             | 1                   | 66                    | 3578.161       | <.001          |
| Time                                      | 2                   | 66                    | 0.700          | 0.500          |
| Group                                     | 2                   | 31                    | 0.798          | 0.459          |
| Car increase                              | 1                   | 31                    | 3.520          | 0.070          |
| TICS social overload                      | 1                   | 31                    | 4.665          | 0.039          |
| Time:group                                | 4                   | 66                    | 1.565          | 0.194          |
